# Supplementary material for: Development of New Meridianin/Leucettine-Derived Hybrid Small Molecules as Nanomolar Multi-Kinase Inhibitors with Antitumor Activity
Source: MDPI journal article supplement (doi:10.3390/biomedicines9091131), 2021-09-01
Supplement: s1 [file s1]

---

**Supplementary material**

# **Development of New Meridianin/Leucettine-Derived Hybrid Small Molecules as Nanomolar Multi-Kinase Inhibitors with Antitumor Activity**

**Mohamed H. Elsherbeny <sup>1,2,3</sup>, Ahmed Elkamhawy <sup>4,5,\*</sup>, Hossam Nada <sup>4,6</sup>, Magda H. Abdellattif <sup>7</sup>, Kyeong Lee <sup>4</sup> and Eun Joo Roh <sup>1,2,\*</sup>**

<sup>1</sup> Chemical Kinomics Research Center, Korea Institute of Science and Technology (KIST), Seoul 02792, Korea

<sup>2</sup> Division of Bio-Medical Science & Technology, KIST School, University of Science and Technology, Seoul 02792, Korea

<sup>3</sup> Pharmaceutical Chemistry Department, Faculty of Pharmacy, Ahrum Canadian University, Giza 12566, Egypt; mohamed.alsherbeny@pharma.asu.edu.eg (M.H.E.)

<sup>4</sup> College of Pharmacy, Dongguk University-Seoul, Goyang 10326, Korea; hossam\_hammouda@dgu.ac.kr (H.N.); kaylee@dongguk.edu (K.L.)

<sup>5</sup> Department of Pharmaceutical Organic Chemistry, Faculty of Pharmacy, Mansoura University, Mansoura 35516, Egypt

<sup>6</sup> Pharmaceutical Chemistry Department, Faculty of Pharmacy, Badr University, Cairo 11829, Egypt

<sup>7</sup> Department of Chemistry, College of Science, Taif University, P.O. Box 11099, Taif 21944, Saudi Arabia; m.hasan@tu.edu.sa (M.H.A)

\* Correspondence: a\_elkamhawy@mans.edu.eg; a.elkamhawy@dongguk.edu (A.E.); r8636@kist.re.kr (E.J.R.)

## Contents

- 1. General methods and instruments (Chemistry)**
- 2. <sup>1</sup>H NMR and <sup>13</sup>C NMR data of compounds 5a–g.**
- 3. LC and MS conditions.**
- 4. Representative purity and HRMS data of compounds 5a–g.**
- 5. Protocol of Kinase assay**
- 6. Biology raw data for IC<sub>50</sub> determination.**
- 7. Antitumor data sheets carried out at NCI, USA.**
- 8. ADME (SwissADME)**

## 1. General methods and instruments (Chemistry)

The NMR spectra were obtained on Bruker Avance 400.  $^1\text{H}$  NMR spectra were referenced to tetramethylsilane ( $\delta = 0.00$  ppm) as an internal standard and are reported as follows: chemical shift, multiplicity (br = broad, s = singlet, d = doublet, t = triplet, dd = doublet of doublet, m = multiplet). Column chromatography was performed on Merck Silica Gel 60 (230–400 mesh) and eluting solvents for all these chromatographic methods are noted as appropriated-mixed solvent with given volume-to-volume ratios. TLC was carried out using glass sheets pre-coated with silica gel 60 F<sub>254</sub> purchased by Merk. The purity of samples was determined by analytical HPLC using a Water ACQUITY UPLC (CORTECS™) with C18 column (2.1 mm x 100 mm; 1.6  $\mu\text{m}$ ) at temperature 40 °C. HPLC data were recorded using parameters as follows: 0.1% formic acid in water and 0.1% formic acid in methanol and flow rate of 0.3 mL/min. High-resolution spectra were performed on Waters ACQUITY UPLC BEH C18 1.7 $\mu$ –Q-TOF SYNAPT G2-Si High-Definition Mass Spectrometry.

## 2. $^1\text{H}$ NMR and $^{13}\text{C}$ NMR data of compounds 5a–g

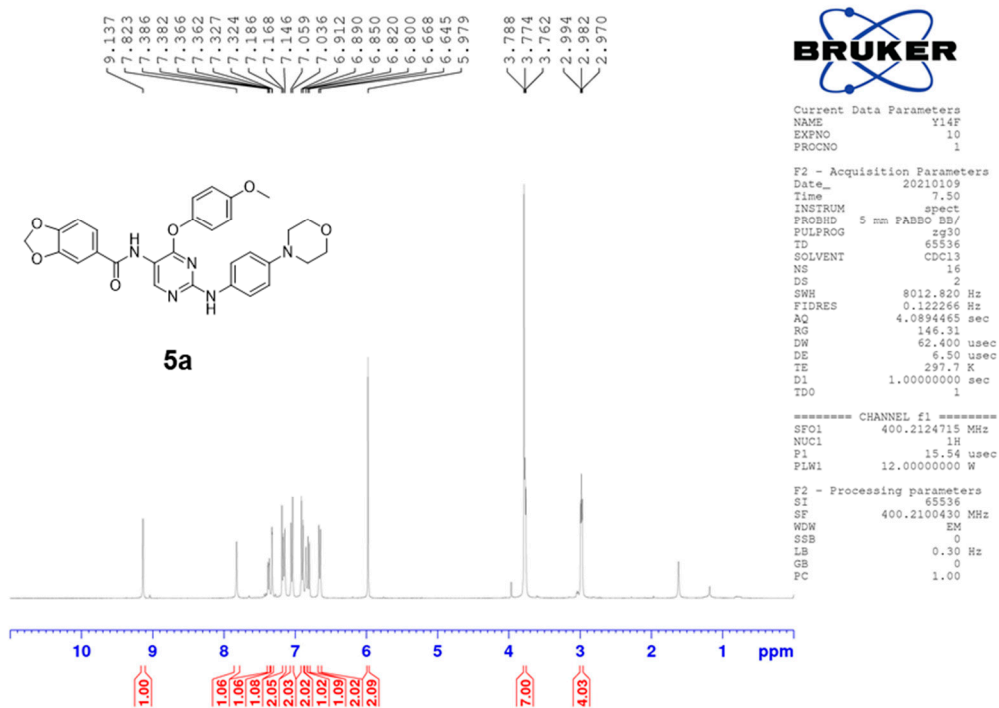

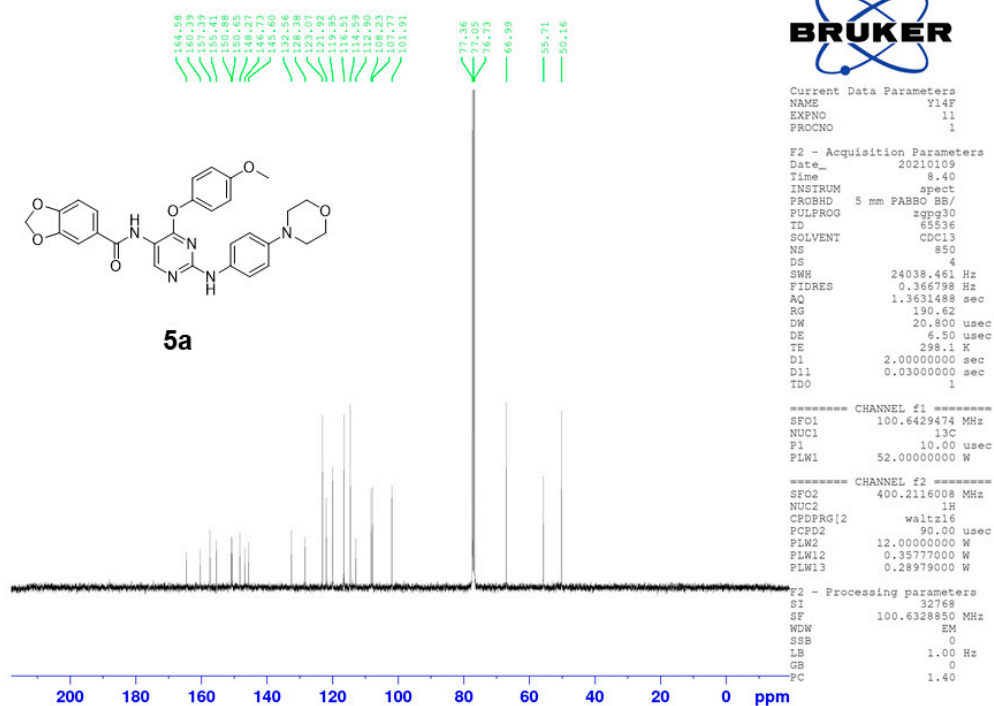

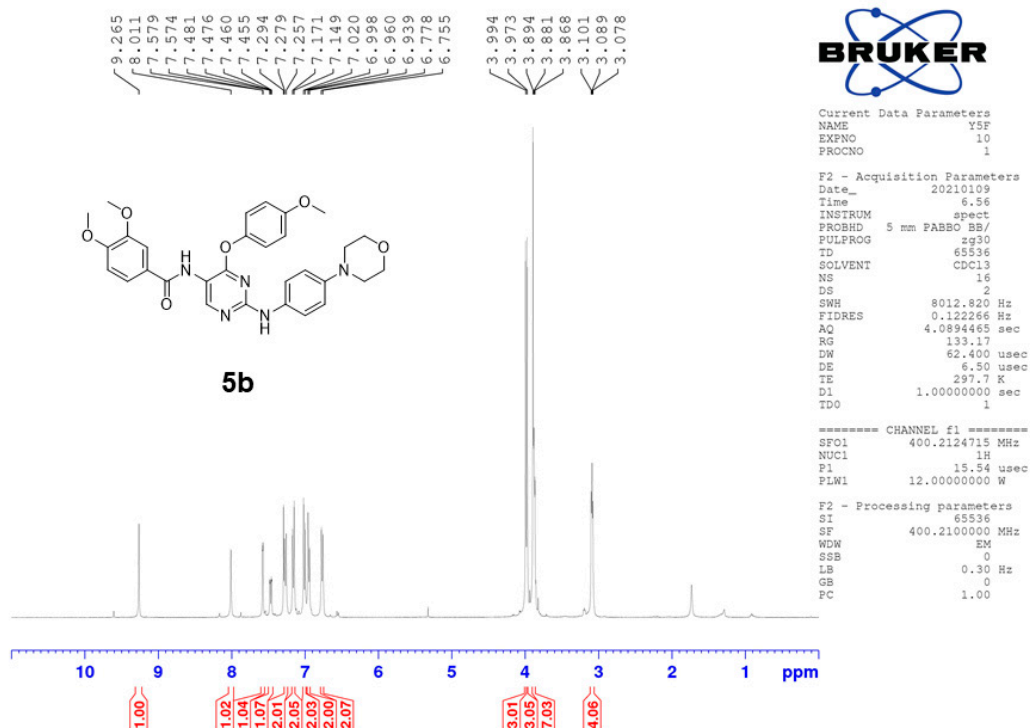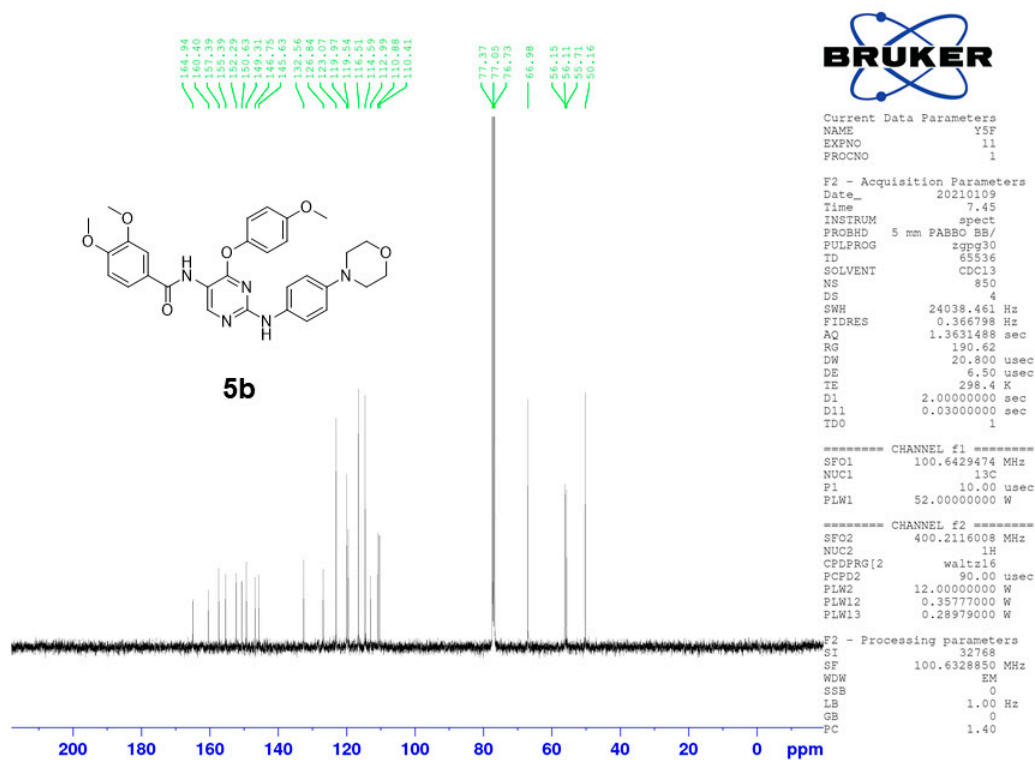

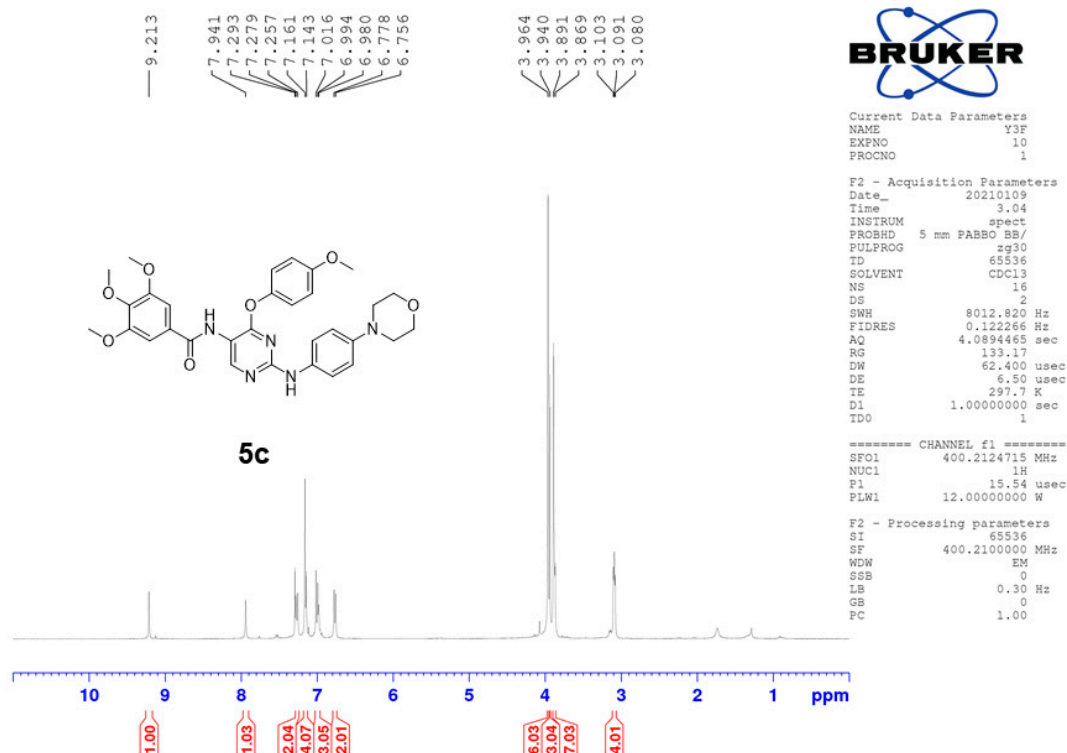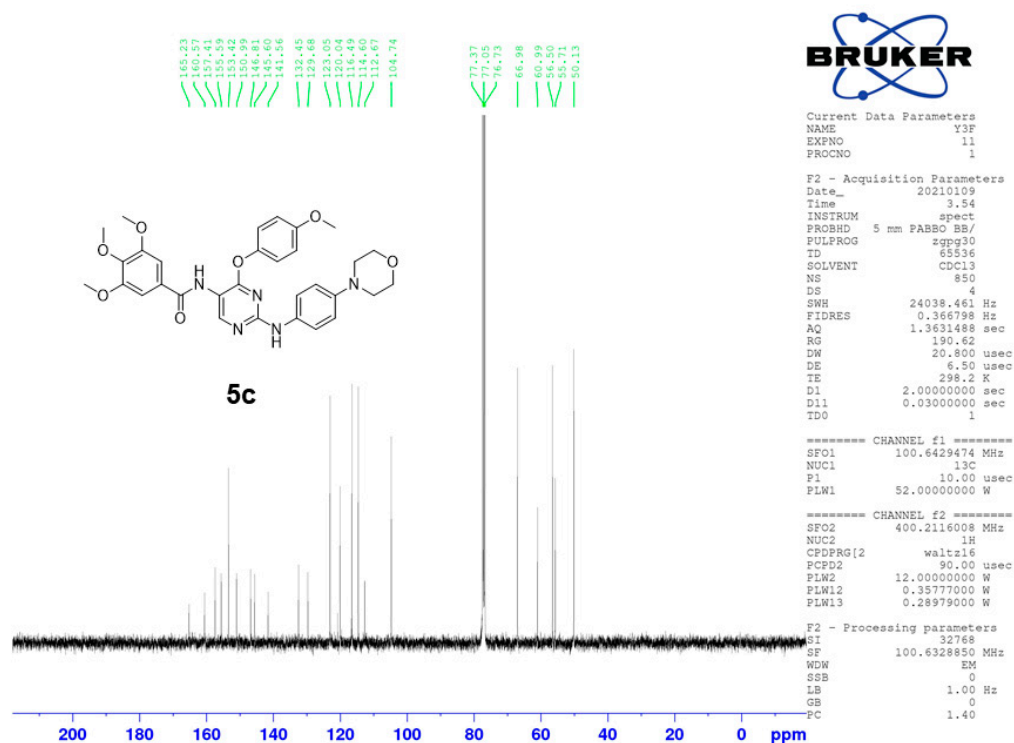

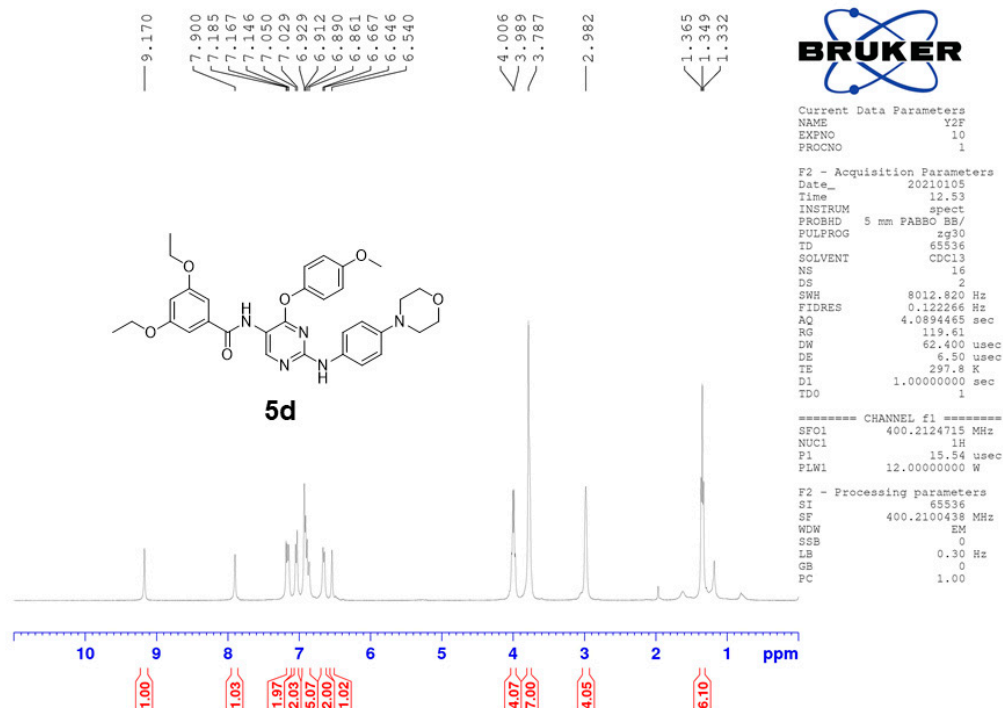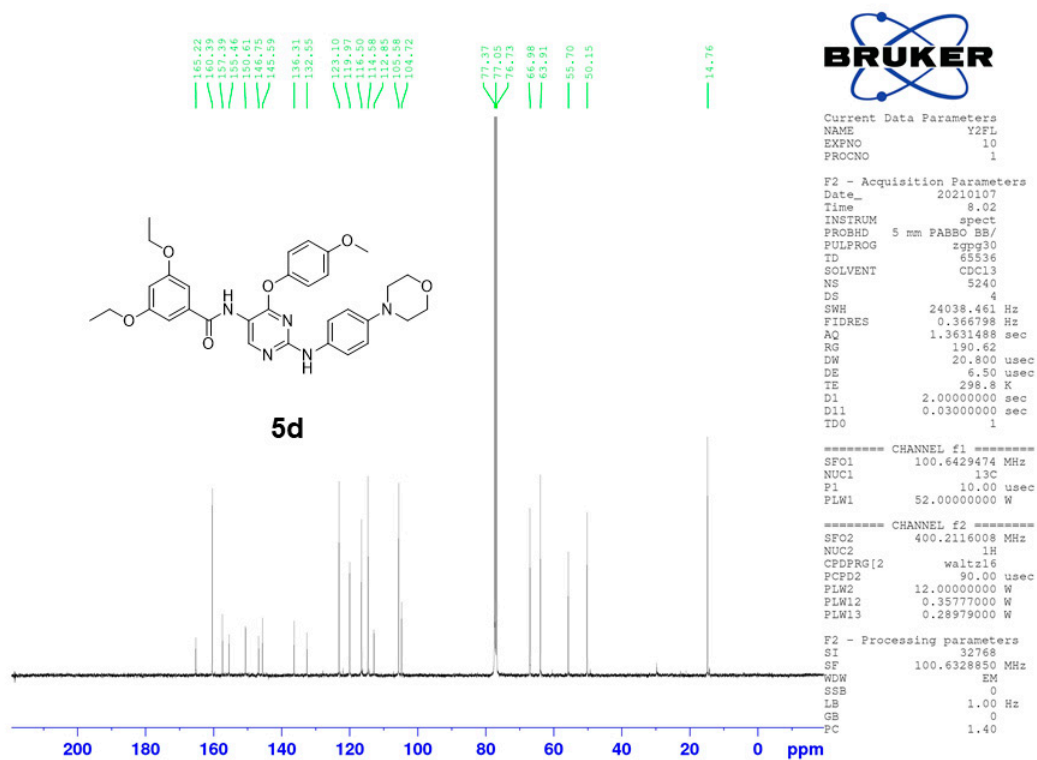

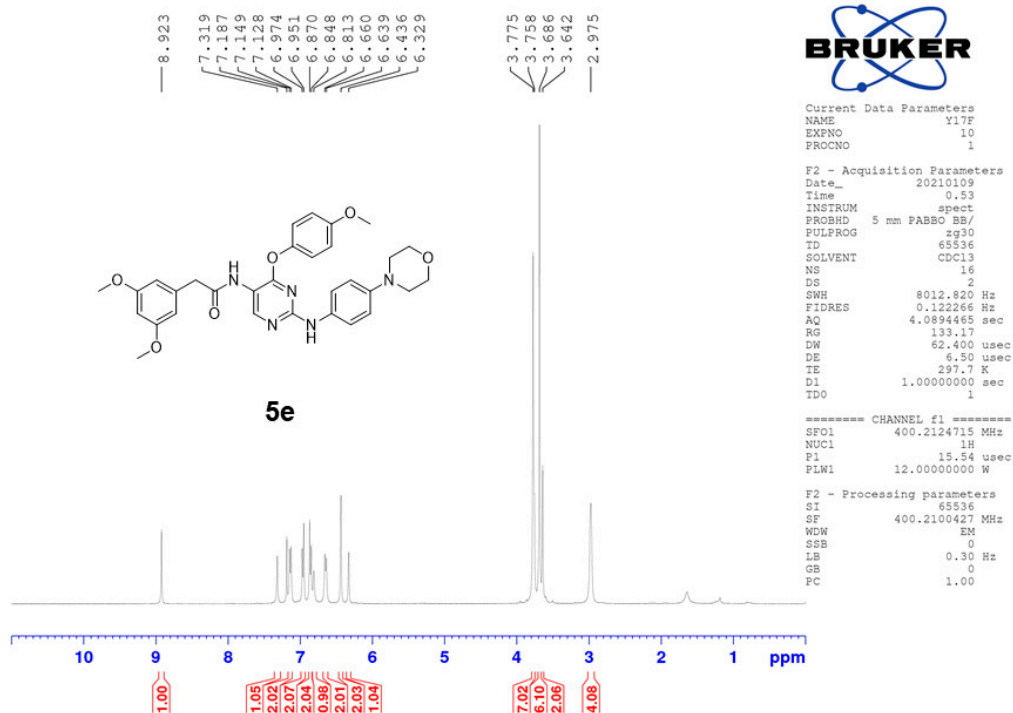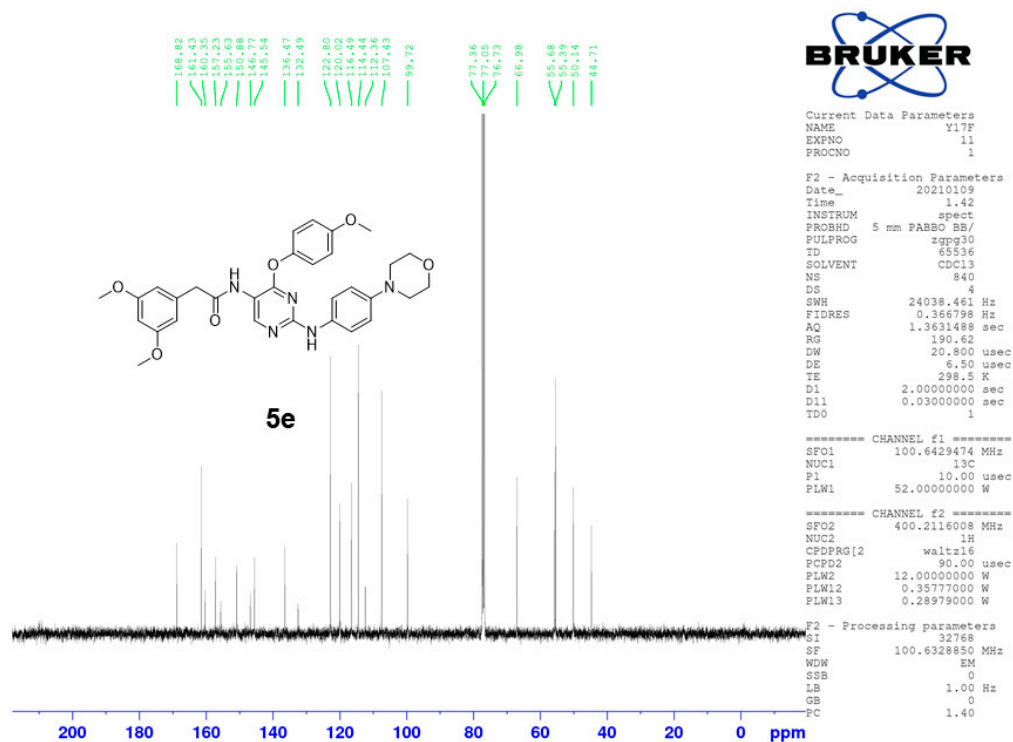



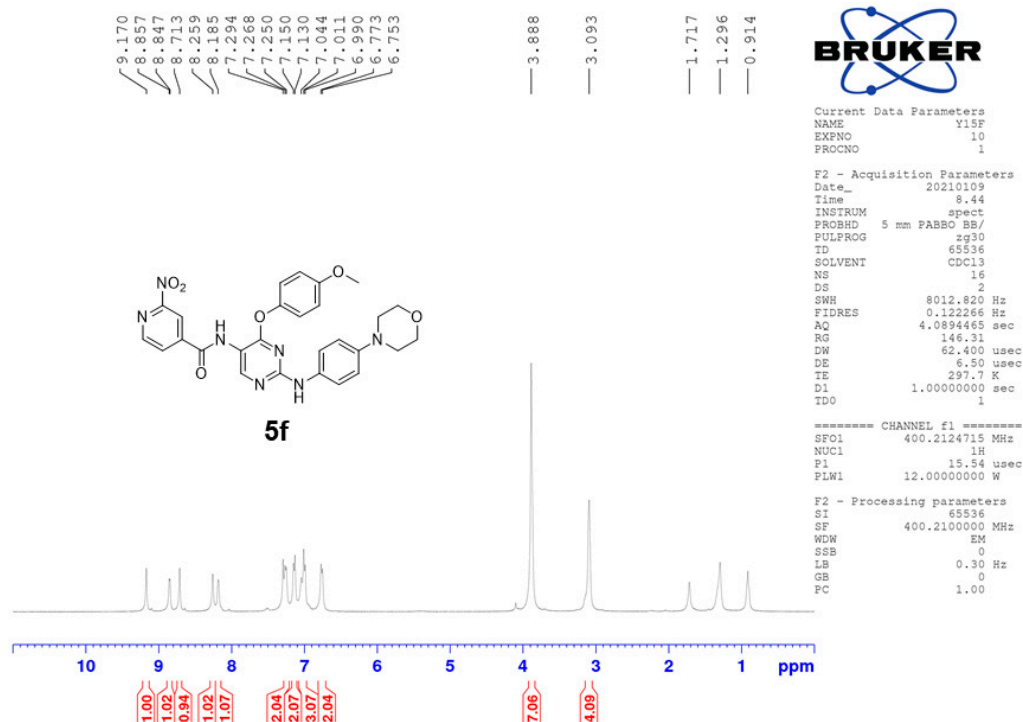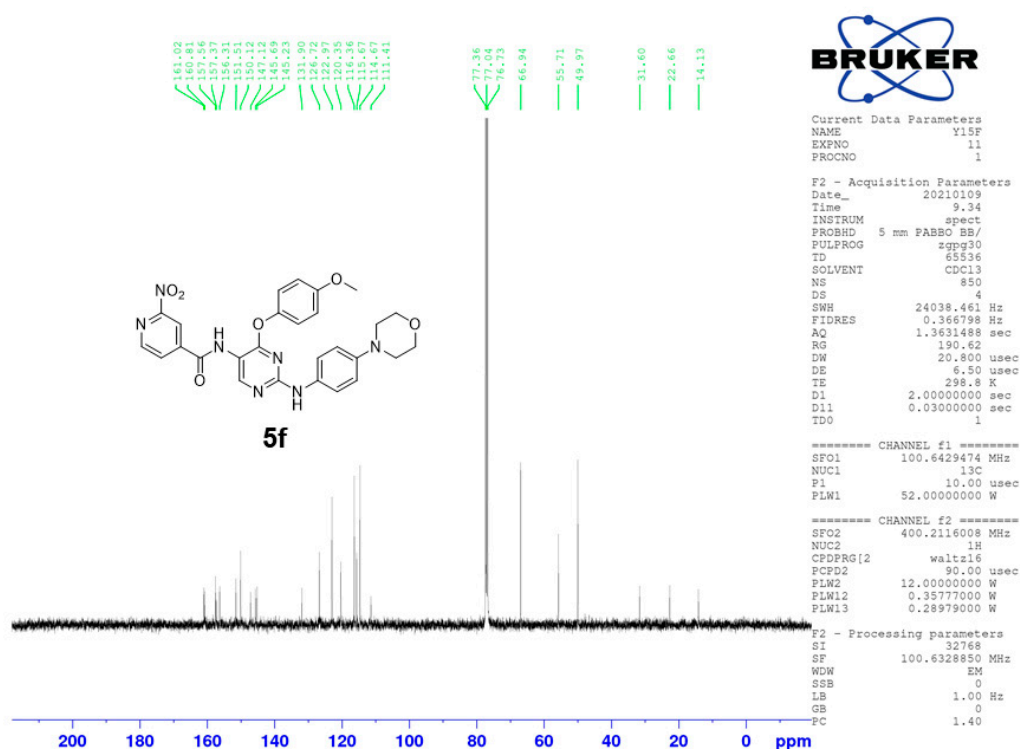

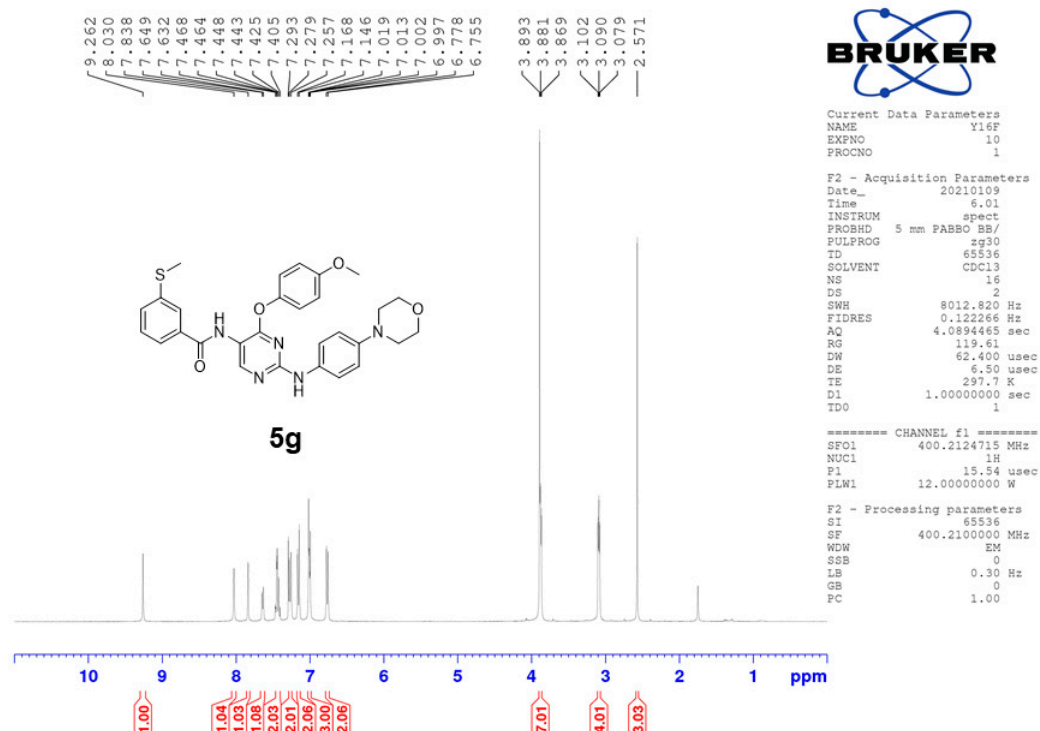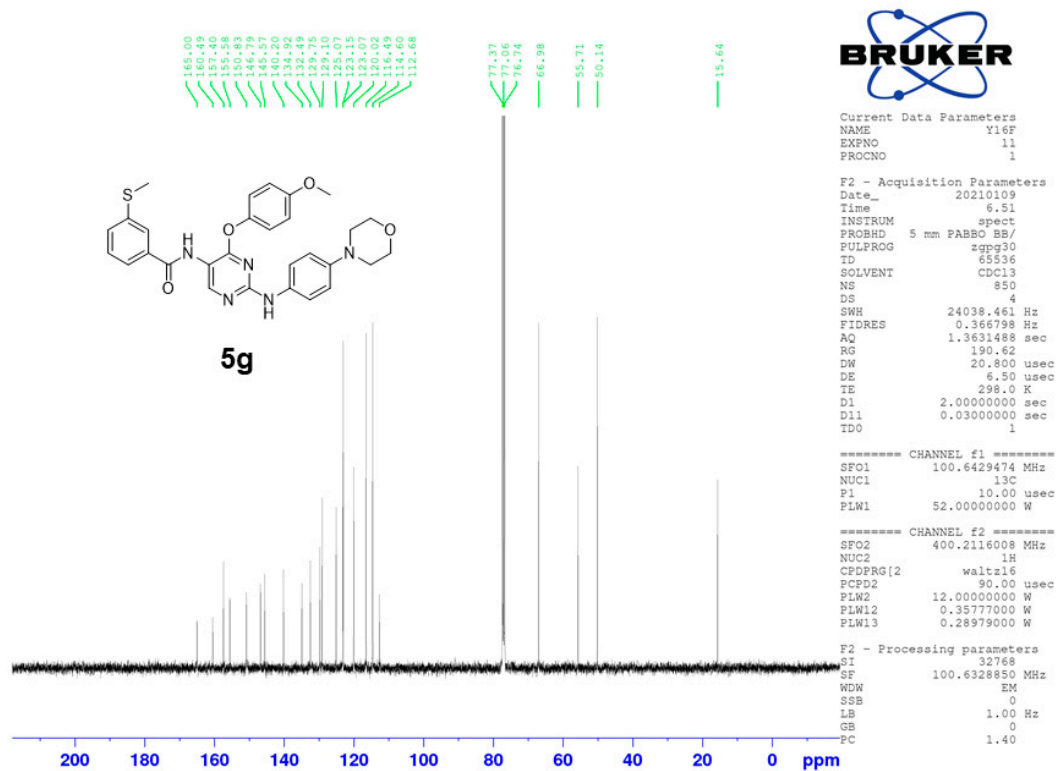

### 3. LC and MS conditions

| LC Condition (Waters® ACQUITY™ UPLC) |                                        |       |       |
|--------------------------------------|----------------------------------------|-------|-------|
| Column                               | CORTECS® UPLC® C18 1.6 µm (2.1x100 mm) |       |       |
|                                      | Temperature : 40 °C                    |       |       |
| Mobile phase                         | A : 0.1% formic acid in water, v/v     |       |       |
|                                      | B : 0.1% formic acid in methanol, v/v  |       |       |
| Gradient                             | Time (min)                             | A (%) | B (%) |
|                                      | 0.0                                    | 99.0  | 1.0   |
|                                      | 1.0                                    | 99.0  | 1.0   |
|                                      | 7.0                                    | 1.0   | 99.0  |
|                                      | 8.5                                    | 1.0   | 99.0  |
|                                      | 9.0                                    | 99.0  | 1.0   |
|                                      | 10.0                                   | 99.0  | 1.0   |
| Flow rate                            | 0.3 ml/min                             |       |       |
| Injection volume                     | 5 µl                                   |       |       |
| MS Condition (SYNAPT™ G2)            |                                        |       |       |
| Ionization Mode                      | ESI+                                   |       |       |
| Capillary                            | +3.1 kv                                |       |       |
| Sampling cone                        | 40 V                                   |       |       |
| Extraction cone                      | 4.0                                    |       |       |
| Source                               | 120 °C                                 |       |       |
| Desolvation                          | 350 °C                                 |       |       |
| Cone gas                             | 100 L/h                                |       |       |
| Desolvation gas                      | 800 L/h                                |       |       |

#### Chromatogram\_blank

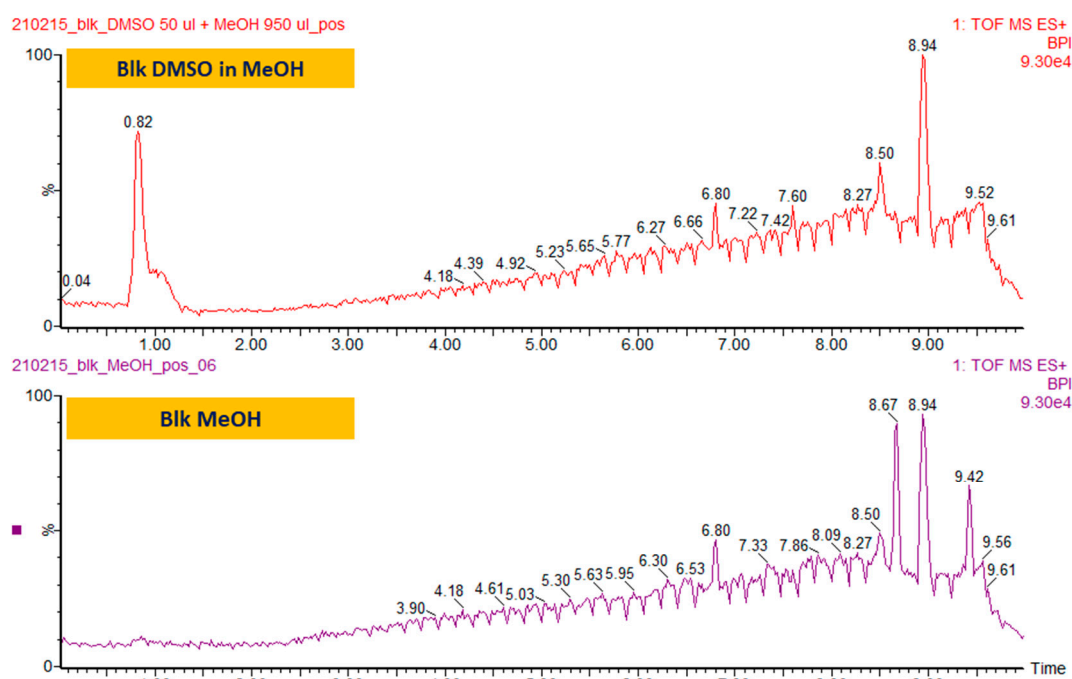

#### 4. Representative purity and HRMS data of compounds 5a–g

##### Peak area(%)\_ Y14

210215\_Dr.REJ\_Mohamed Hamdy Elsherbeny\_Y14\_pos Sm (Mn, 2x3)

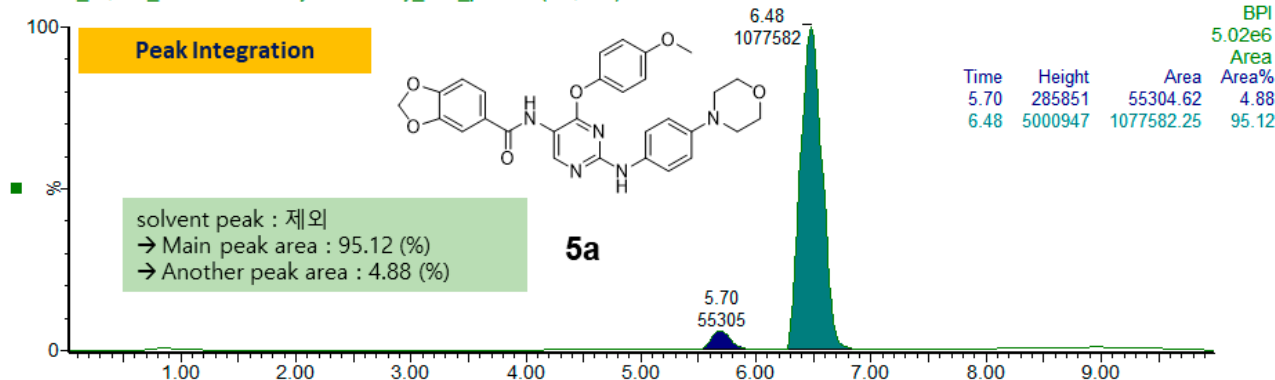

##### MS Spectrum\_ Isotope modeling\_Y14

210215\_Dr.REJ\_Mohamed Hamdy Elsherbeny\_Y14\_pos (6.517) Is (1.00,1.00) C<sub>29</sub>H<sub>27</sub>N<sub>5</sub>O<sub>6</sub>H1: TOF MS ES+  
7.06e12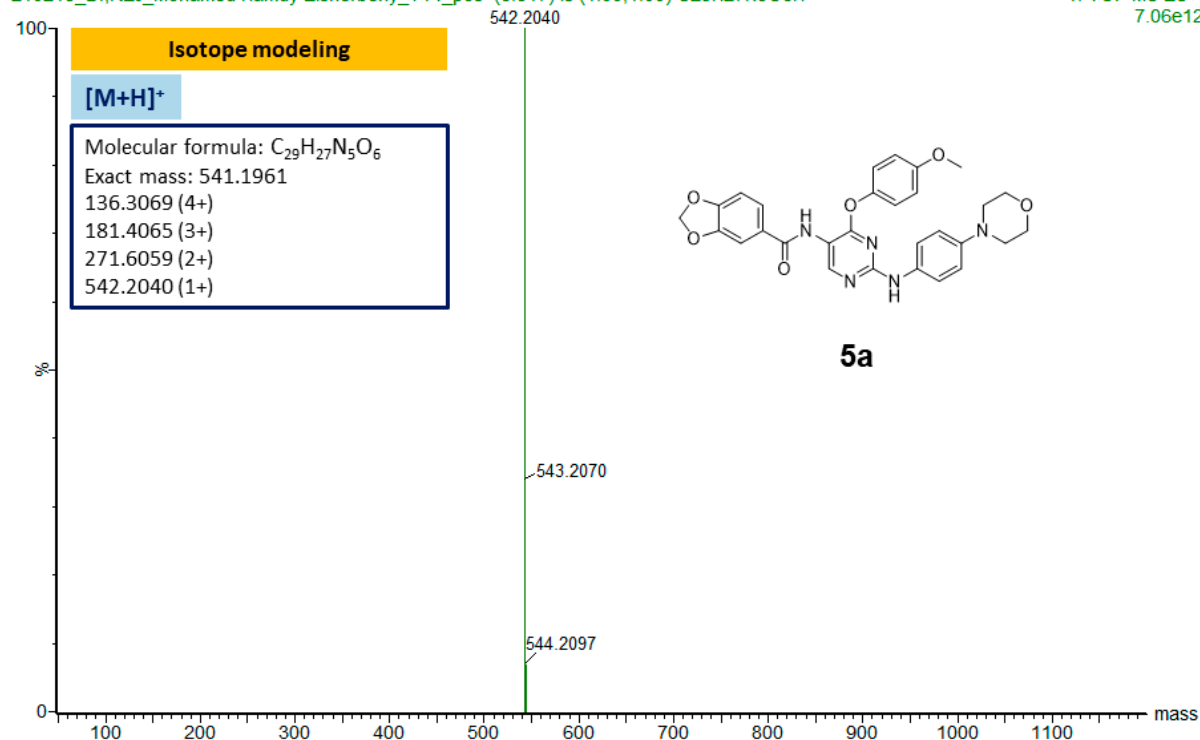

## Peak area(%)\_Y5

210215\_Dr,REJ\_Mohamed Hamdy Elsherbeny\_Y5\_pos Sm (Mn, 2x3)

1: TOF MS ES+

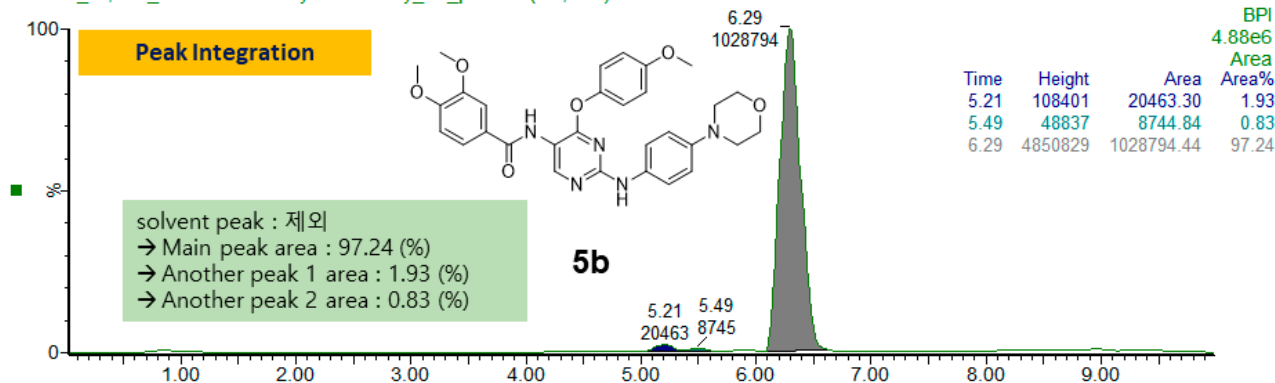

## MS Spectrum\_ Isotope modeling\_Y5

210215\_Dr,REJ\_Mohamed Hamdy Elsherbeny\_Y5\_pos (6.375) Is (1.00,1.00) C<sub>30</sub>H<sub>31</sub>N<sub>5</sub>O<sub>6</sub>H1: TOF MS ES+  
6.98e12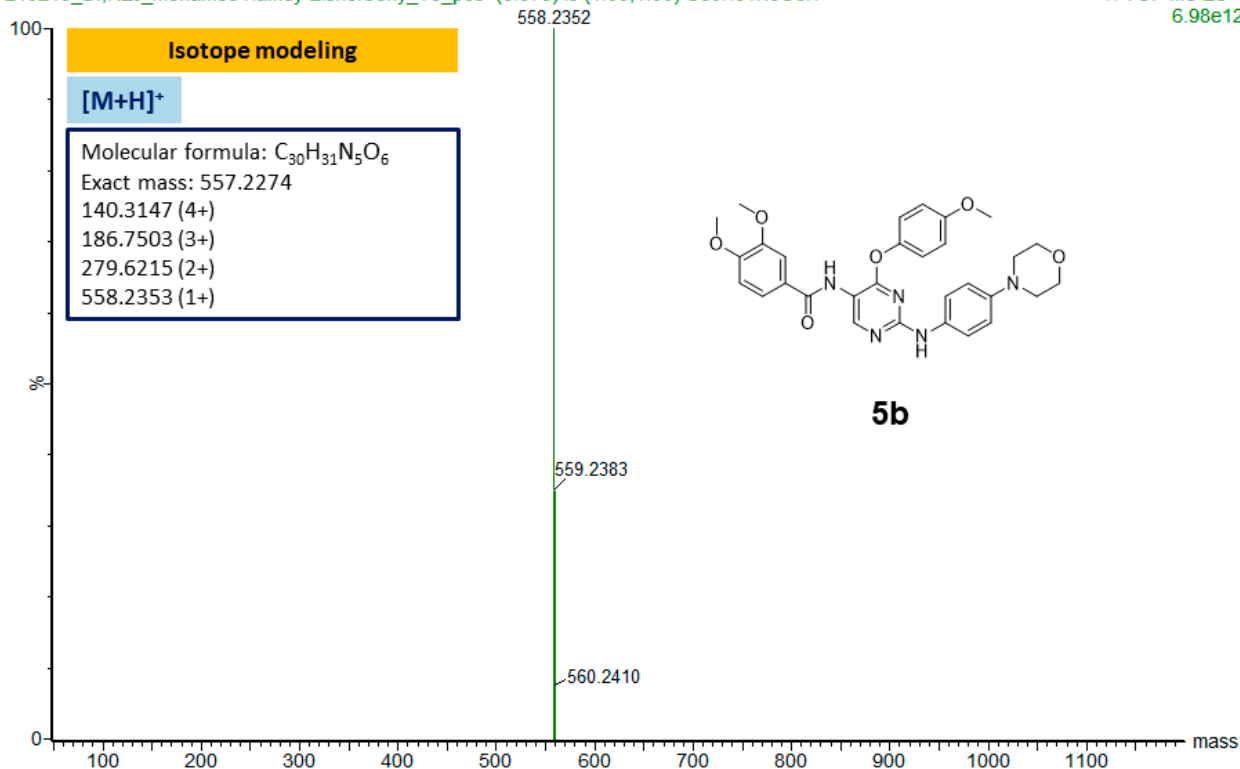

## MS Spectrum\_ Isotope modeling\_Y3

210215\_Dr.REJ\_Mohamed Hamdy Elsherbeny\_Y3\_pos (6.412) Is (1.00,1.00) C<sub>31</sub>H<sub>33</sub>N<sub>5</sub>O<sub>7</sub>H1: TOF MS ES+  
6.89e12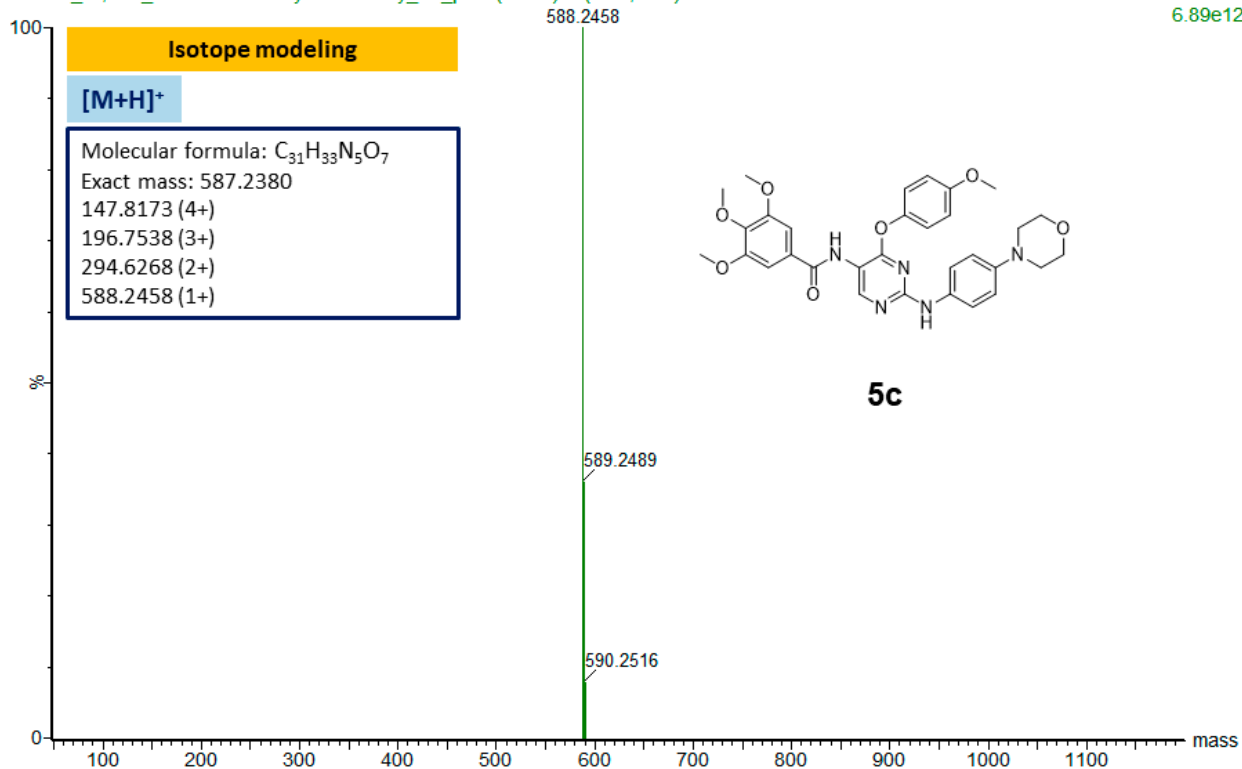

## MS Spectrum\_ Isotope modeling\_Y2

210215\_Dr.REJ\_Mohamed Hamdy Elsherbeny\_Y2\_pos (7.065) Is (1.00,1.00) C<sub>32</sub>H<sub>35</sub>N<sub>5</sub>O<sub>6</sub>H1: TOF MS ES+  
6.83e12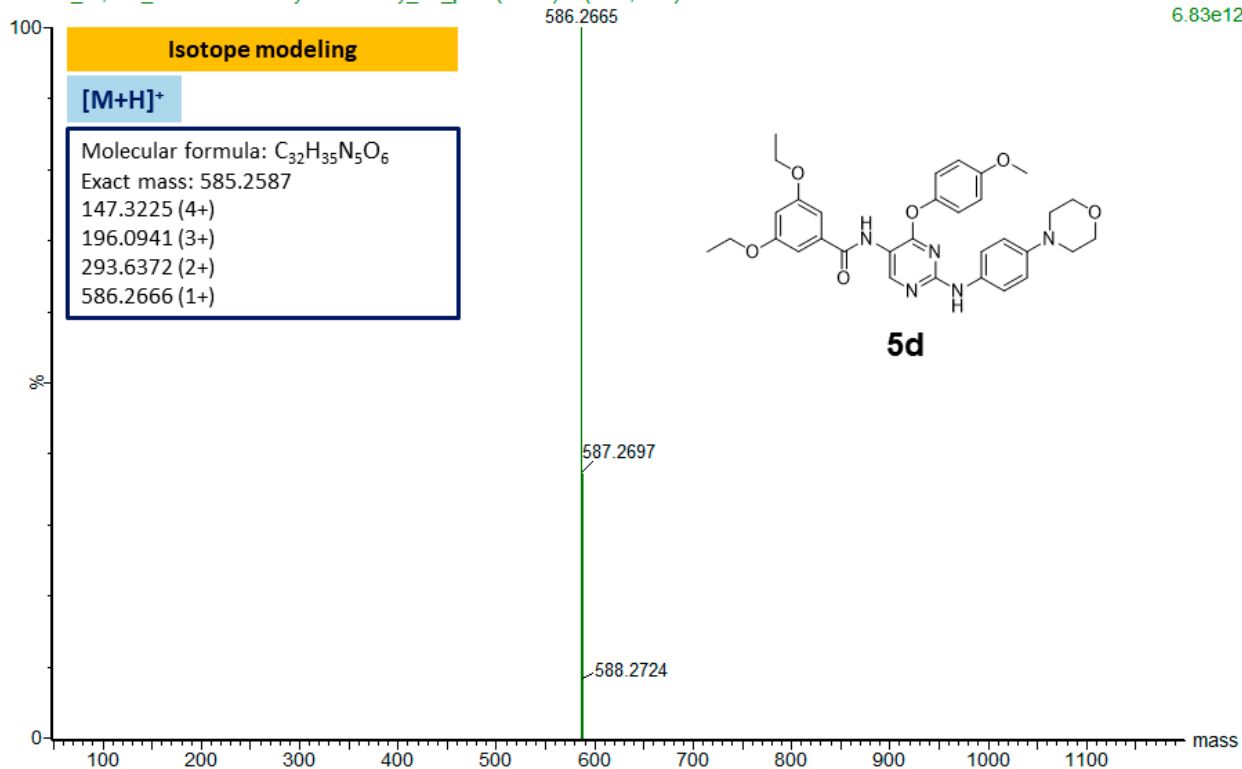

## Peak area(%)\_ Y17

210215\_Dr,REJ\_Mohamed Hamdy Elsherbeny\_Y17\_pos Sm (Mn, 2x3)

1: TOF MS ES+

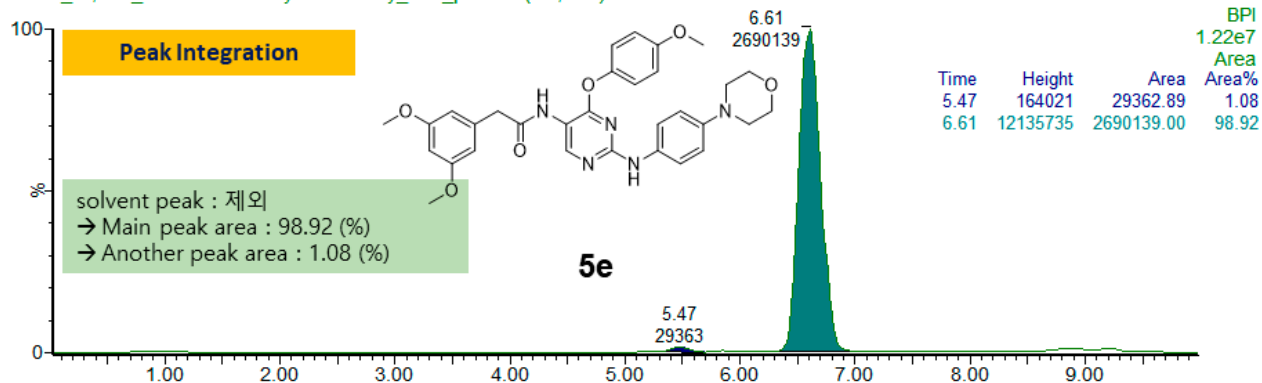

## MS Spectrum\_ Isotope modeling\_Y17

210215\_Dr,REJ\_Mohamed Hamdy Elsherbeny\_Y17\_pos (6.624) Is (1.00,1.00) C<sub>31</sub>H<sub>33</sub>N<sub>5</sub>O<sub>6</sub>H1: TOF MS ES+  
6.91e12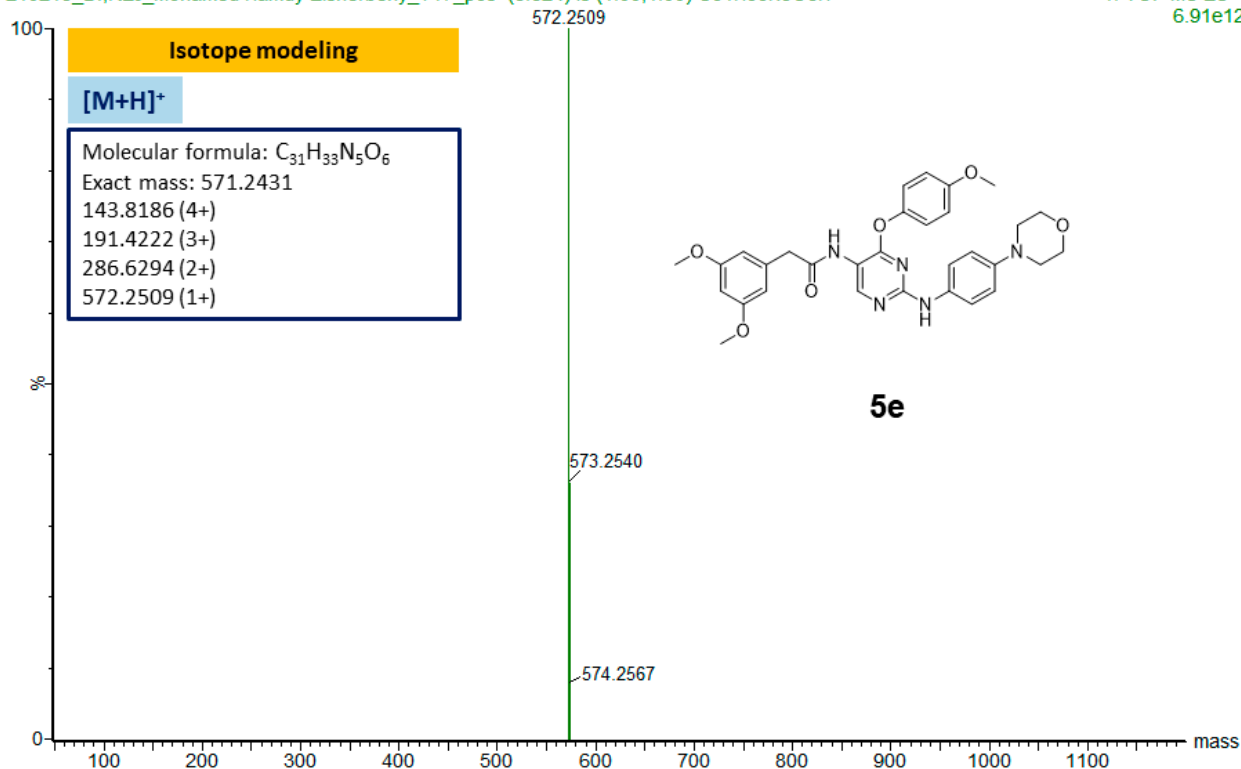



## MS Spectrum\_ Isotope modeling\_Y15

210215\_Dr.REJ\_Mohamed Hamdy Elsherbeny\_Y15\_pos (6.340) Is (1.00,1.00) C<sub>27</sub>H<sub>25</sub>N<sub>7</sub>O<sub>6</sub>H1: TOF MS ES+  
7.16e12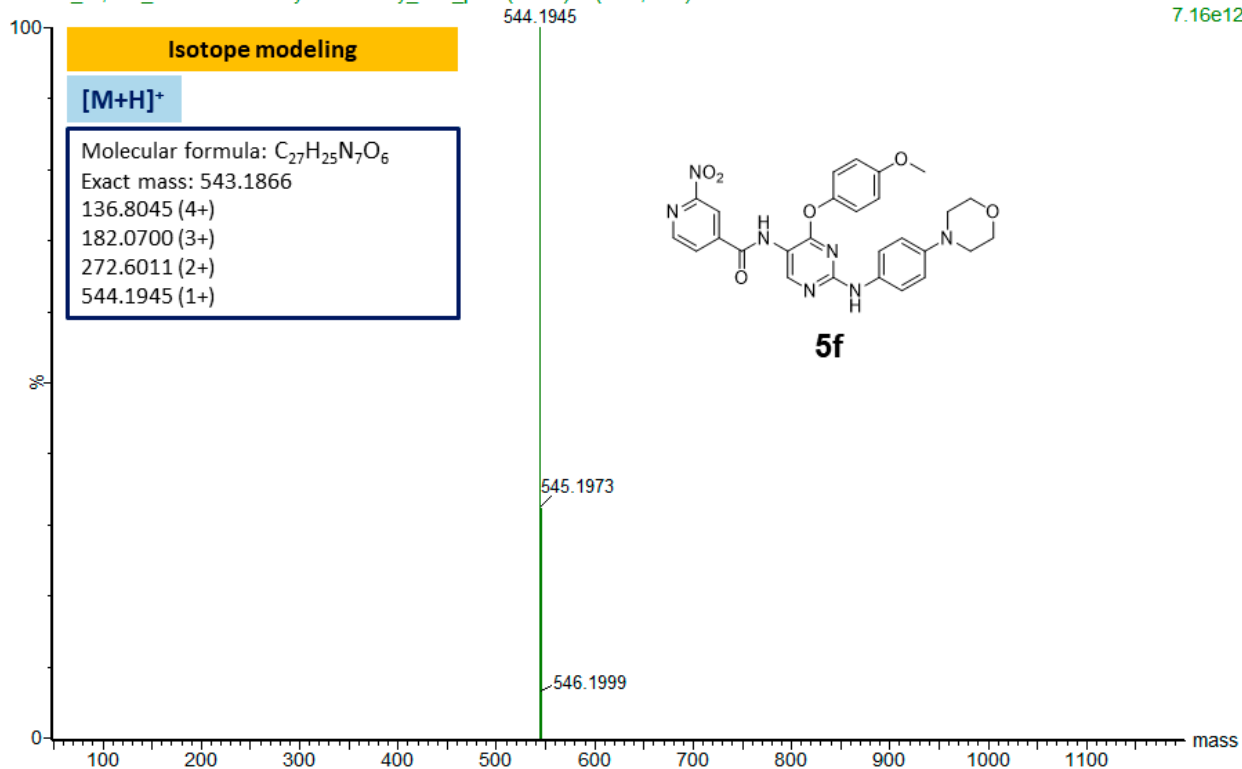

## Peak area(%)\_ Y16

210215\_Dr,REJ\_Mohamed Hamdy Elsherbeny\_Y16\_pos Sm (Mn, 2x3)

1: TOF MS ES+

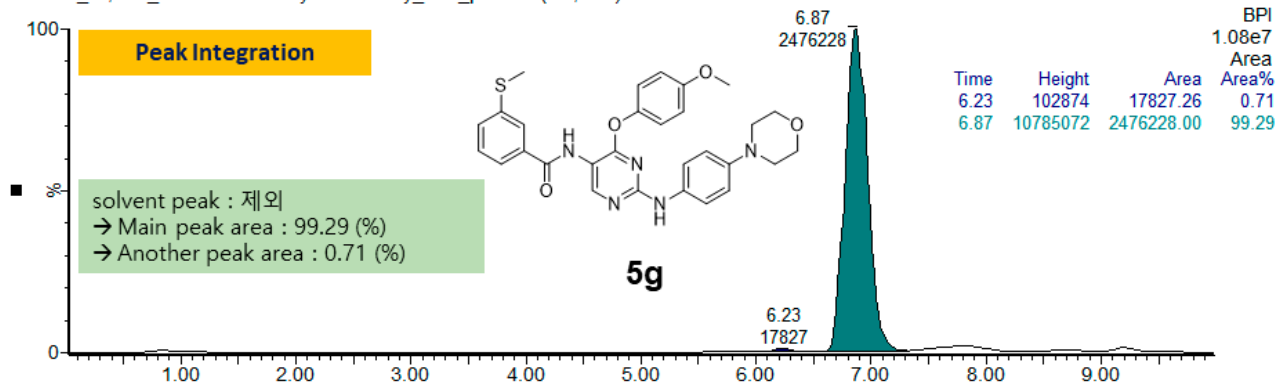

## MS Spectrum\_ Isotope modeling\_ Y16

210215\_Dr,REJ\_Mohamed Hamdy Elsherbeny\_Y16\_pos (6.905) Is (1.00,1.00) C<sub>29</sub>H<sub>29</sub>N<sub>5</sub>O<sub>4</sub>SH1: TOF MS ES+  
6.74e12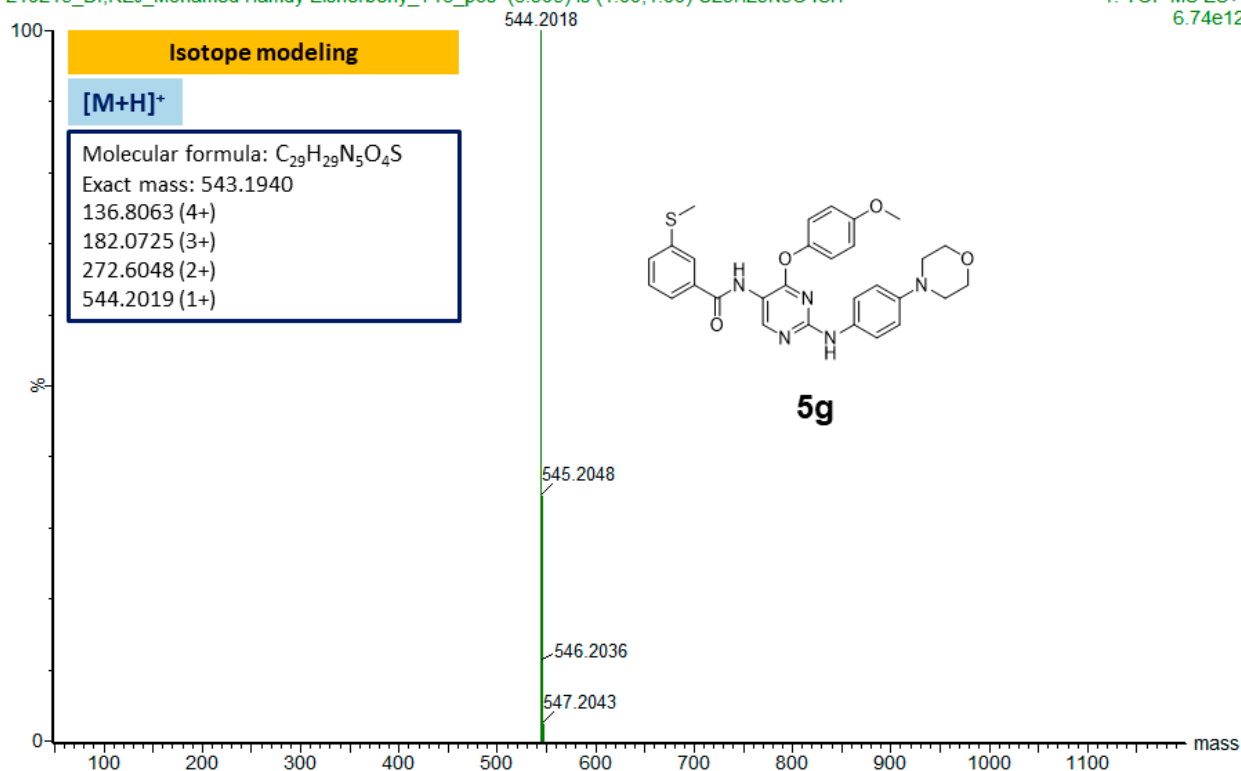

## 5. Protocol of Kinase assay

Kinase Profiling is 10 dose IC<sub>50</sub> singlet assay. Kinases inhibitory activities were assessed by the HotSpot assay platform, which contained specific kinase/substrate pairs along with required cofactors. Base reaction buffer: 20 mM Hepes (pH 7.5), 10 mM MgCl<sub>2</sub>, 1 mM EGTA, 0.02% Brij35, 0.02 mg/ml BSA, 0.1 mM Na<sub>3</sub>VO<sub>4</sub>, 2 mM DTT, 1% DMSO. Testing compounds were dissolved in 100% DMSO to specific concentration. The serial dilution was conducted by Integra Viaflo Assist in DMSO. The reaction mixture containing the examined compound and <sup>33</sup>P-ATP was incubated at room temperature for 2h and radioactivity was detected by filter-binding method. Kinase activity data were expressed as the percent remaining kinase activity in test samples compared to vehicle (dimethyl sulfoxide) reactions. IC<sub>50</sub> values and curve fits were obtained using Prism (GraphPad Software).

## 6. Biology raw data for IC<sub>50</sub> determination

| Paper ID  | Cpd ID | NSC Number |
|-----------|--------|------------|
| <b>5d</b> | DK_Y2  | 827664     |
| <b>5c</b> | DK_Y3  | 827665     |
| <b>5b</b> | DK_Y5  | 827666     |
| <b>5a</b> | DK_Y14 | 827667     |
| <b>5f</b> | DK_Y15 | 827668     |
| <b>5g</b> | DK_Y16 | 827669     |
| <b>5e</b> | DK_Y17 | 827670     |

|    | A                            | B         | C        | D        | E             | F                |
|----|------------------------------|-----------|----------|----------|---------------|------------------|
| 1  | Kinase Profiling Report for: |           |          | LYN      |               |                  |
| 2  |                              |           |          |          |               |                  |
| 3  | Raw data                     |           |          |          |               |                  |
| 4  |                              | Conc. (M) | DK_Y16   | DK_Y16   | Staurosporine | Stauro Conc. (M) |
| 5  |                              | 1.00E-04  | 102058   | 97795    | 457           | 2.00E-05         |
| 6  |                              | 3.33E-05  | 91411    | 96509    | 4781          | 5.00E-06         |
| 7  |                              | 1.11E-05  | 99636    | 88012    | 2031          | 1.25E-06         |
| 8  |                              | 3.70E-06  | 107790   | 123234   | 5061          | 3.13E-07         |
| 9  |                              | 1.23E-06  | 402276   | 397973   | 17915         | 7.81E-08         |
| 10 |                              | 4.12E-07  | 1012948  | 1008099  | 85789         | 1.95E-08         |
| 11 |                              | 1.37E-07  | 1424580  | 1521179  | 415780        | 4.88E-09         |
| 12 |                              | 4.57E-08  | 2039036  | 2069042  | 1312529       | 1.22E-09         |
| 13 |                              | 1.52E-08  | 2645282  | 2501772  | 2138576       | 3.05E-10         |
| 14 |                              | 5.08E-09  | 2797609  | 2601868  | 2360674       | 7.63E-11         |
| 15 |                              | DMSO      | 2948480  | 2640293  | 2536190       | DMSO             |
| 16 |                              |           |          |          |               |                  |
| 17 |                              |           |          |          |               |                  |
| 18 | %Activity                    |           |          |          |               |                  |
| 19 |                              | Conc. (M) | DK_Y16   | DK_Y16   | Staurosporine | Stauro Conc. (M) |
| 20 |                              | 1.00E-04  | 3.77     | 3.61     | 0.02          | 2.00E-05         |
| 21 |                              | 3.33E-05  | 3.38     | 3.56     | 0.18          | 5.00E-06         |
| 22 |                              | 1.11E-05  | 3.68     | 3.25     | 0.08          | 1.25E-06         |
| 23 |                              | 3.70E-06  | 3.98     | 4.55     | 0.19          | 3.13E-07         |
| 24 |                              | 1.23E-06  | 14.85    | 14.69    | 0.66          | 7.81E-08         |
| 25 |                              | 4.12E-07  | 37.40    | 37.22    | 3.17          | 1.95E-08         |
| 26 |                              | 1.37E-07  | 52.60    | 56.17    | 15.35         | 4.88E-09         |
| 27 |                              | 4.57E-08  | 75.29    | 76.40    | 48.46         | 1.22E-09         |
| 28 |                              | 1.52E-08  | 97.67    | 92.37    | 78.96         | 3.05E-10         |
| 29 |                              | 5.08E-09  | 103.30   | 96.07    | 87.16         | 7.63E-11         |
| 30 |                              | DMSO      | 108.87   | 97.49    | 93.64         | DMSO             |
| 31 |                              |           |          |          |               |                  |
| 32 |                              | HILLSLOPE | -0.80    | -0.90    | -1.20         |                  |
| 33 |                              | IC50 (M)  | 1.38E-07 | 2.00E-07 | 1.32E-09      |                  |
| 34 |                              |           |          |          |               |                  |
| 35 |                              |           |          |          |               |                  |

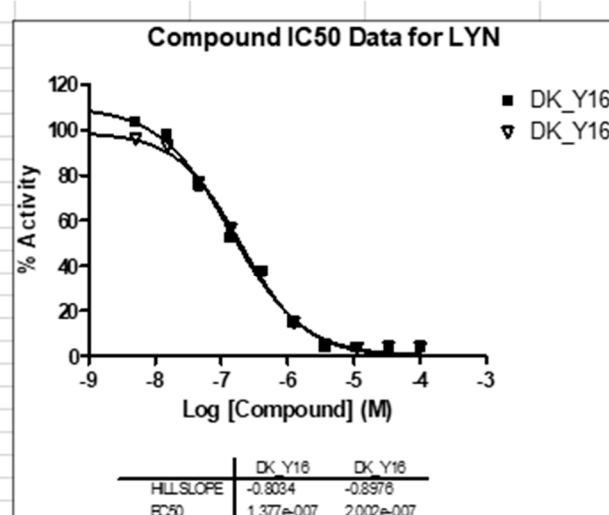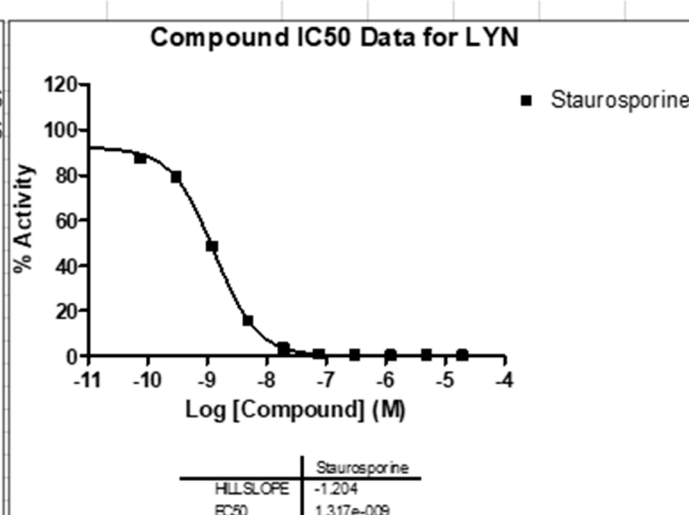

|    | A                            | B         | C        | D        | E             | F                |
|----|------------------------------|-----------|----------|----------|---------------|------------------|
| 1  | Kinase Profiling Report for: |           |          | LCK      |               |                  |
| 2  |                              |           |          |          |               |                  |
| 3  | Raw data                     |           |          |          |               |                  |
| 4  |                              | Conc. (M) | DK_Y16   | DK_Y16   | Staurosporine | Stauro Conc. (M) |
| 5  |                              | 1.00E-04  | 23600    | 28153    | 2798          | 2.00E-05         |
| 6  |                              | 3.33E-05  | 25579    | 22567    | 2536          | 5.00E-06         |
| 7  |                              | 1.11E-05  | 24308    | 24444    | 3537          | 1.25E-06         |
| 8  |                              | 3.70E-06  | 24200    | 25454    | 6391          | 3.13E-07         |
| 9  |                              | 1.23E-06  | 87291    | 97081    | 16456         | 7.81E-08         |
| 10 |                              | 4.12E-07  | 283755   | 269570   | 62683         | 1.95E-08         |
| 11 |                              | 1.37E-07  | 625889   | 650022   | 379559        | 4.88E-09         |
| 12 |                              | 4.57E-08  | 984306   | 991895   | 835742        | 1.22E-09         |
| 13 |                              | 1.52E-08  | 1067683  | 1298284  | 1382806       | 3.05E-10         |
| 14 |                              | 5.08E-09  | 1392250  | 1385928  | 1452961       | 7.63E-11         |
| 15 |                              | DMSO      | 1517343  | 1516956  | 1515635       | DMSO             |
| 16 |                              |           |          |          |               |                  |
| 17 |                              |           |          |          |               |                  |
| 18 | %Activity                    |           |          |          |               |                  |
| 19 |                              | Conc. (M) | DK_Y16   | DK_Y16   | Staurosporine | Stauro Conc. (M) |
| 20 |                              | 1.00E-04  | 1.50     | 1.79     | 0.18          | 2.00E-05         |
| 21 |                              | 3.33E-05  | 1.63     | 1.44     | 0.16          | 5.00E-06         |
| 22 |                              | 1.11E-05  | 1.55     | 1.56     | 0.23          | 1.25E-06         |
| 23 |                              | 3.70E-06  | 1.54     | 1.62     | 0.41          | 3.13E-07         |
| 24 |                              | 1.23E-06  | 5.56     | 6.19     | 1.05          | 7.81E-08         |
| 25 |                              | 4.12E-07  | 18.08    | 17.18    | 3.99          | 1.95E-08         |
| 26 |                              | 1.37E-07  | 39.89    | 41.43    | 24.19         | 4.88E-09         |
| 27 |                              | 4.57E-08  | 62.73    | 63.21    | 53.26         | 1.22E-09         |
| 28 |                              | 1.52E-08  | 68.04    | 82.74    | 88.12         | 3.05E-10         |
| 29 |                              | 5.08E-09  | 88.73    | 88.32    | 92.60         | 7.63E-11         |
| 30 |                              | DMSO      | 96.70    | 96.67    | 96.53         | DMSO             |
| 31 |                              |           |          |          |               |                  |
| 32 |                              | HILLSLOPE | -0.83    | -0.98    | -1.14         |                  |
| 33 |                              | IC50 (M)  | 7.94E-08 | 9.59E-08 | 1.63E-09      |                  |
| 34 |                              |           |          |          |               |                  |
| 35 |                              |           |          |          |               |                  |

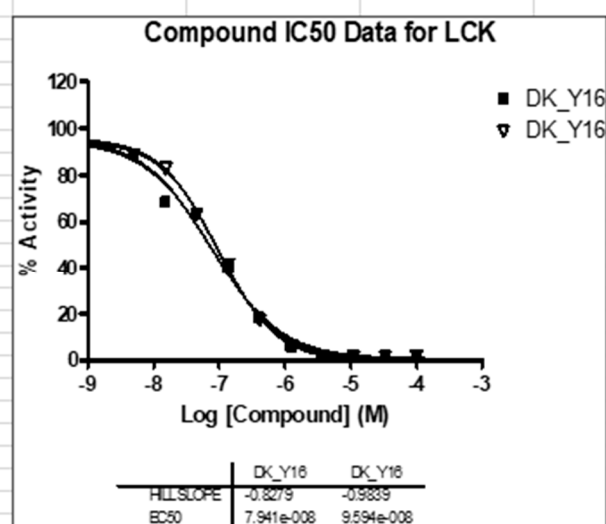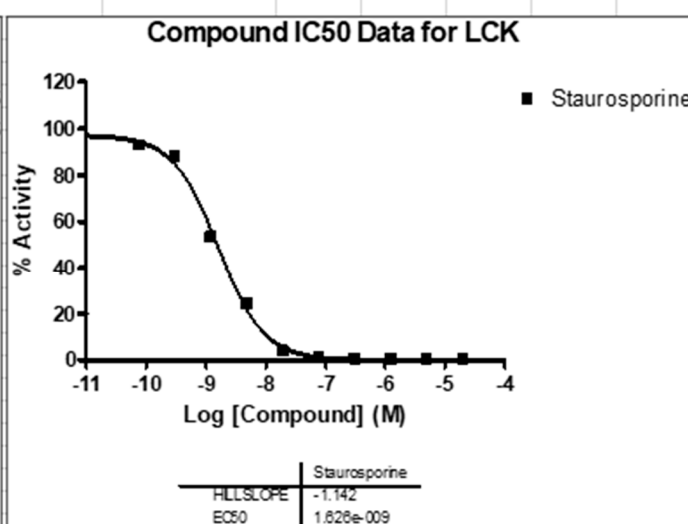

|    | A                            | B         | C        | D        | E        | F        | G                             | H               |
|----|------------------------------|-----------|----------|----------|----------|----------|-------------------------------|-----------------|
| 1  | Kinase Profiling Report for: |           |          | FMS      |          |          |                               |                 |
| 2  |                              |           |          |          |          |          |                               |                 |
| 3  | Raw data                     |           |          |          |          |          |                               |                 |
| 4  |                              | Conc.(M)  | DK_Y2    | DK_Y2    | DK_Y16   | DK_Y16   | Staurosporine                 | Stauro Conc.(M) |
| 5  |                              | 1.00E-04  | -97      | -1909    | 9816     | 9452     | -1707                         | 2.00E-05        |
| 6  |                              | 3.33E-05  | 2760     | 4094     | 12057    | 11554    | -7936                         | 5.00E-06        |
| 7  |                              | 1.11E-05  | 10980    | 9617     | 7998     | 7906     | -3557                         | 1.25E-06        |
| 8  |                              | 3.70E-06  | 39265    | 31468    | 15729    | 18380    | -3529                         | 3.13E-07        |
| 9  |                              | 1.23E-06  | 76846    | 77042    | 49210    | 48785    | -3941                         | 7.81E-08        |
| 10 |                              | 4.12E-07  | 177528   | 156344   | 119524   | 112724   | 7057                          | 1.95E-08        |
| 11 |                              | 1.37E-07  | 289596   | 324465   | 233088   | 208611   | 72113                         | 4.88E-09        |
| 12 |                              | 4.57E-08  | 395925   | 391901   | 341069   | 349825   | 289324                        | 1.22E-09        |
| 13 |                              | 1.52E-08  | 446517   | 436856   | 426845   | 397685   | 186                           | 3.05E-10        |
| 14 |                              | 5.08E-09  | 491433   | 487793   | 464322   | 466912   | 493584                        | 7.63E-11        |
| 15 |                              | DMSO      | 478093   | 504603   | 491922   | 498472   | 525118                        | DMSO            |
| 16 |                              |           |          |          |          |          |                               |                 |
| 17 |                              |           |          |          |          |          |                               |                 |
| 18 | %Activity                    |           |          |          |          |          | Value excluded from curve fit |                 |
| 19 |                              | Conc.(M)  | DK_Y2    | DK_Y2    | DK_Y16   | DK_Y16   | Staurosporine                 | Stauro Conc.(M) |
| 20 |                              | 1.00E-04  | -0.02    | -0.38    | 1.96     | 1.89     | -0.34                         | 2.00E-05        |
| 21 |                              | 3.33E-05  | 0.55     | 0.82     | 2.41     | 2.31     | -1.59                         | 5.00E-06        |
| 22 |                              | 1.11E-05  | 2.20     | 1.92     | 1.60     | 1.58     | -0.71                         | 1.25E-06        |
| 23 |                              | 3.70E-06  | 7.86     | 6.30     | 3.15     | 3.68     | -0.71                         | 3.13E-07        |
| 24 |                              | 1.23E-06  | 15.38    | 15.42    | 9.85     | 9.76     | -0.79                         | 7.81E-08        |
| 25 |                              | 4.12E-07  | 35.53    | 31.29    | 23.92    | 22.56    | 1.41                          | 1.95E-08        |
| 26 |                              | 1.37E-07  | 57.96    | 64.94    | 46.65    | 41.75    | 14.43                         | 4.88E-09        |
| 27 |                              | 4.57E-08  | 79.24    | 78.44    | 68.26    | 70.02    | 57.91                         | 1.22E-09        |
| 28 |                              | 1.52E-08  | 89.37    | 87.43    | 85.43    | 79.59    | 0.04                          | 3.05E-10        |
| 29 |                              | 5.08E-09  | 98.36    | 97.63    | 92.93    | 93.45    | 98.79                         | 7.63E-11        |
| 30 |                              | DMSO      | 95.69    | 100.99   | 98.45    | 99.77    | 105.10                        | DMSO            |
| 31 |                              |           |          |          |          |          |                               |                 |
| 32 |                              | HILLSLOPE | -0.93    | -0.95    | -0.91    | -0.87    | -1.47                         |                 |
| 33 |                              | IC50 (M)  | 2.14E-07 | 2.12E-07 | 1.18E-07 | 1.02E-07 | 1.44E-09                      |                 |
| 34 |                              |           |          |          |          |          |                               |                 |

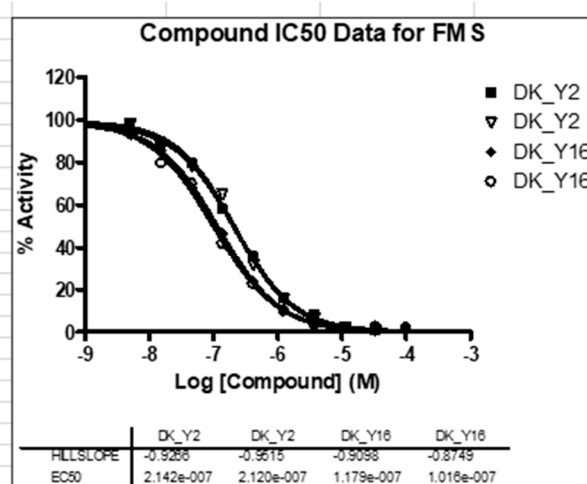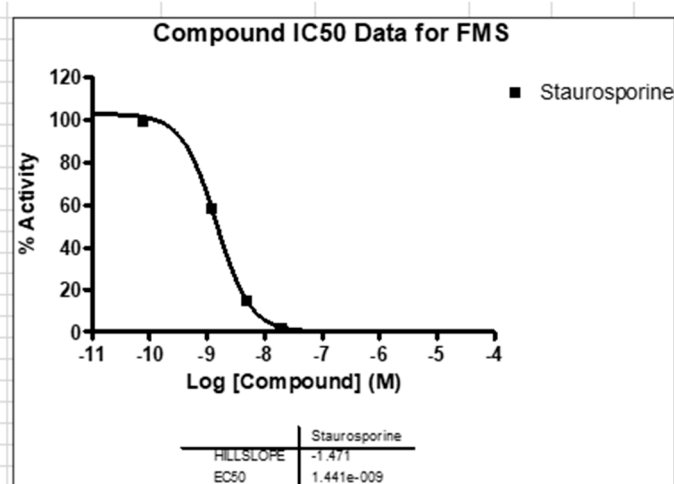

## 7. Antitumor data sheets carried out at NCI, USA.

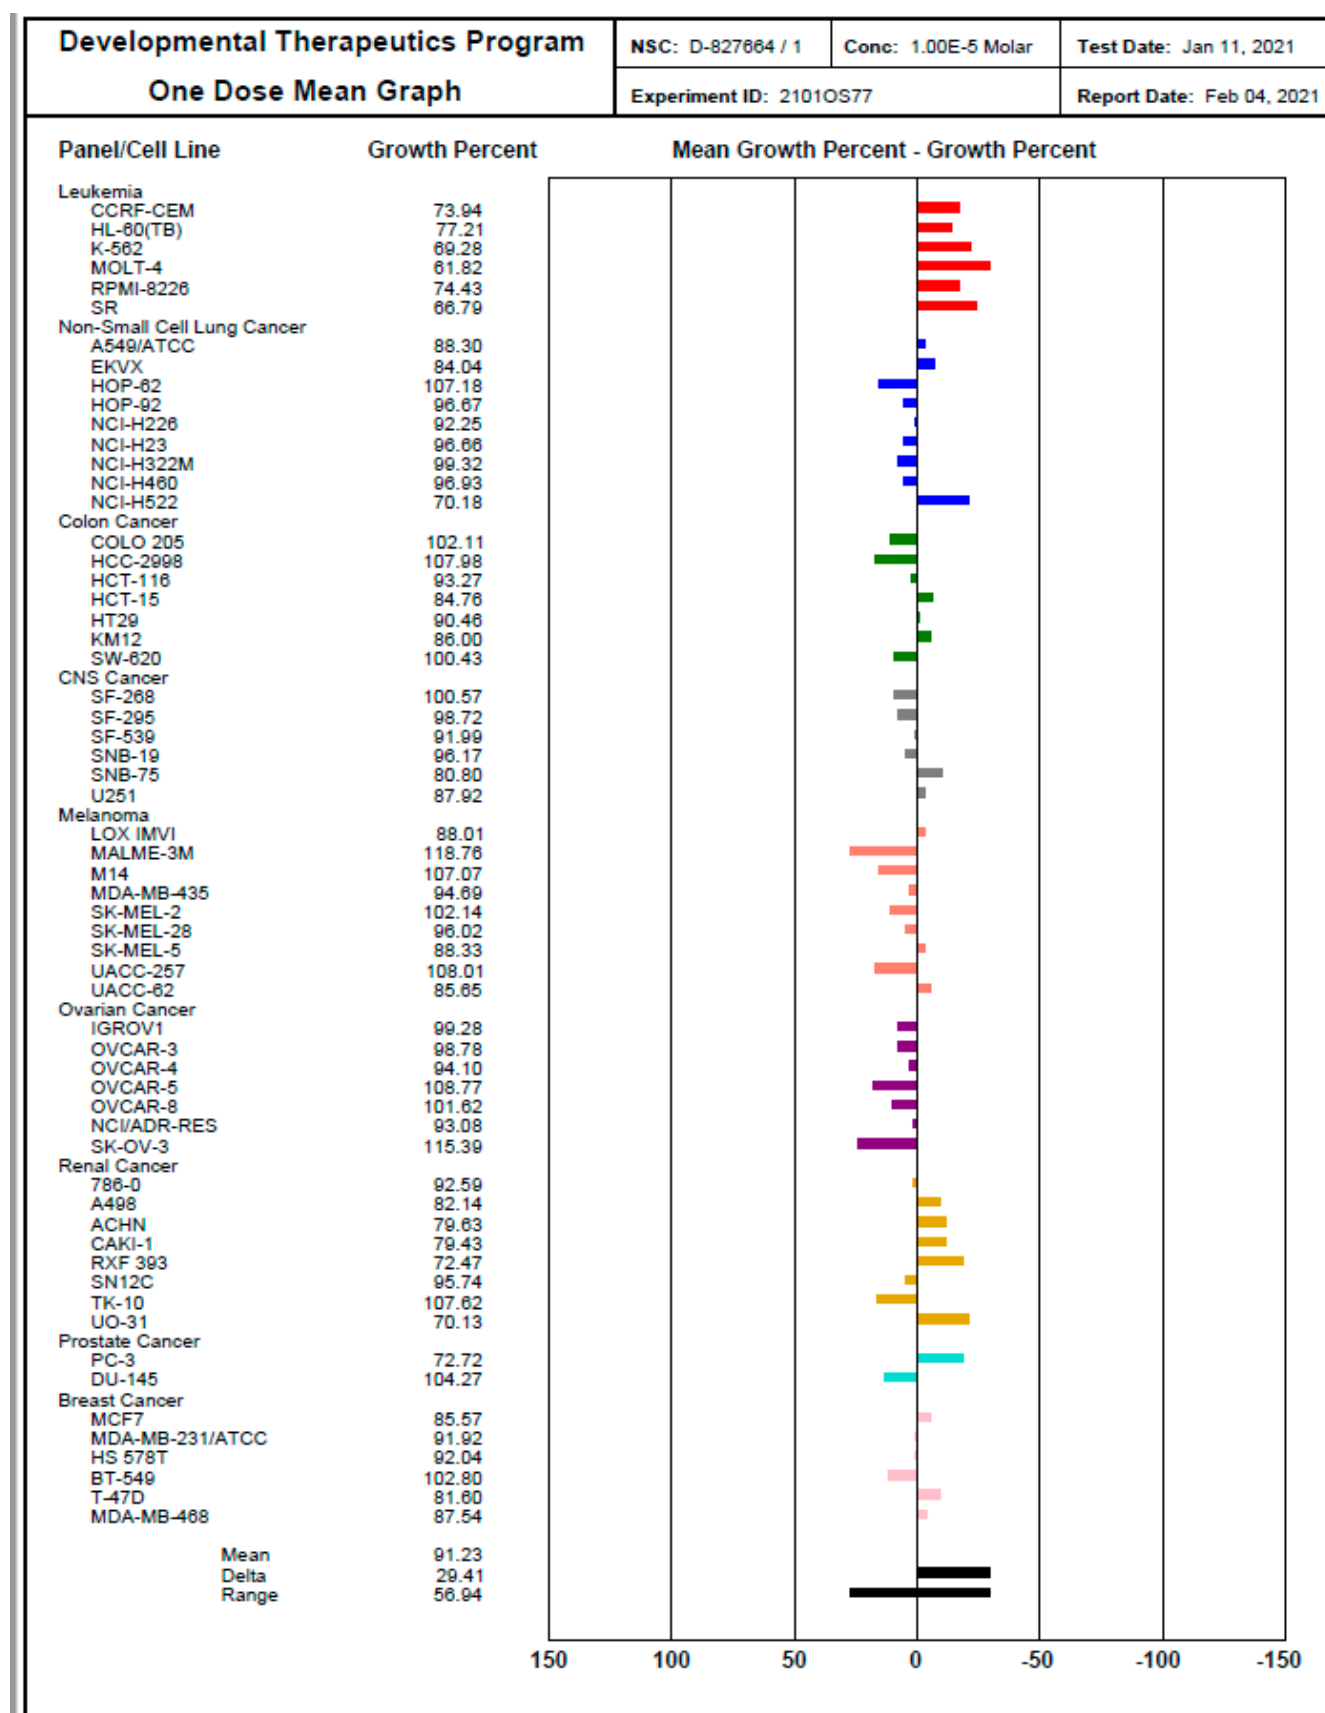

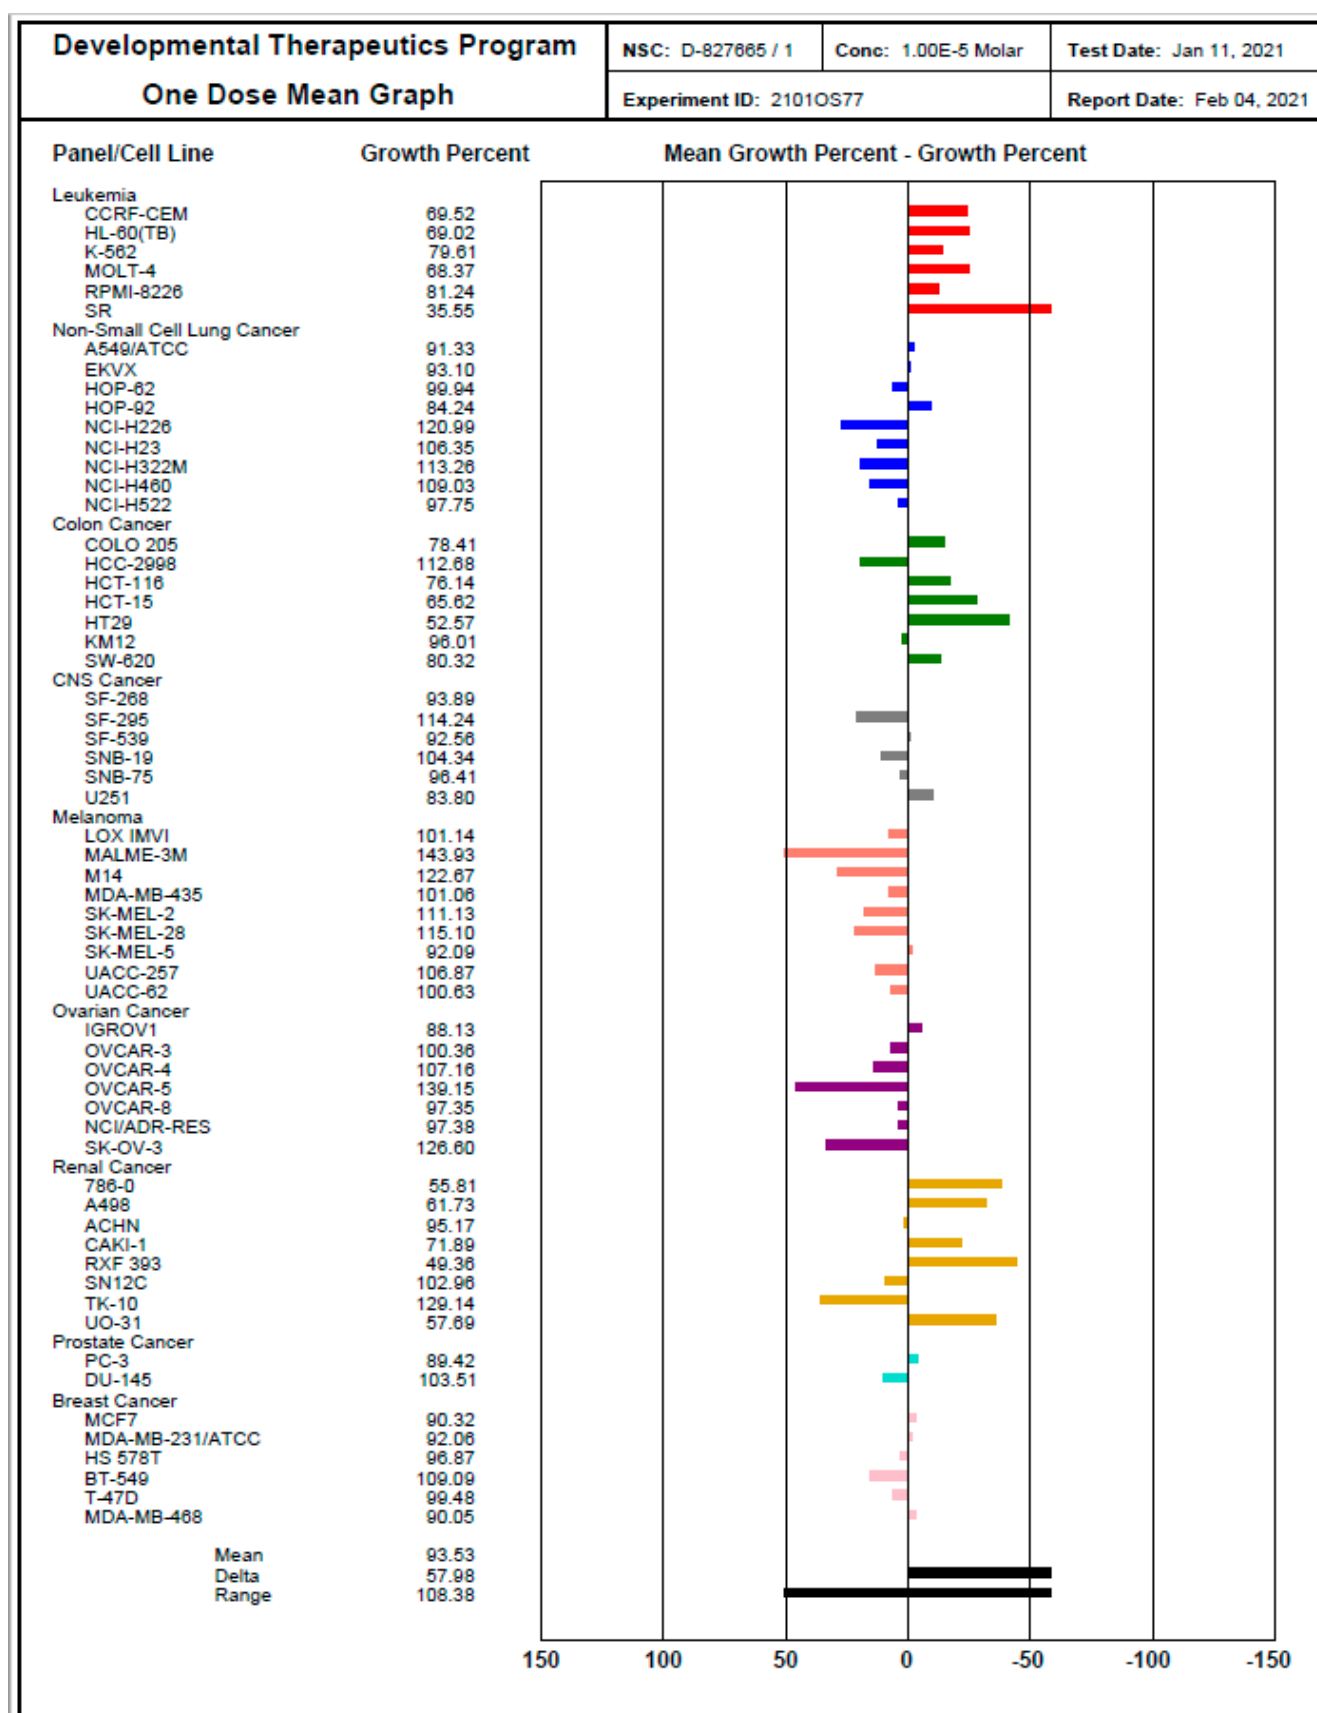



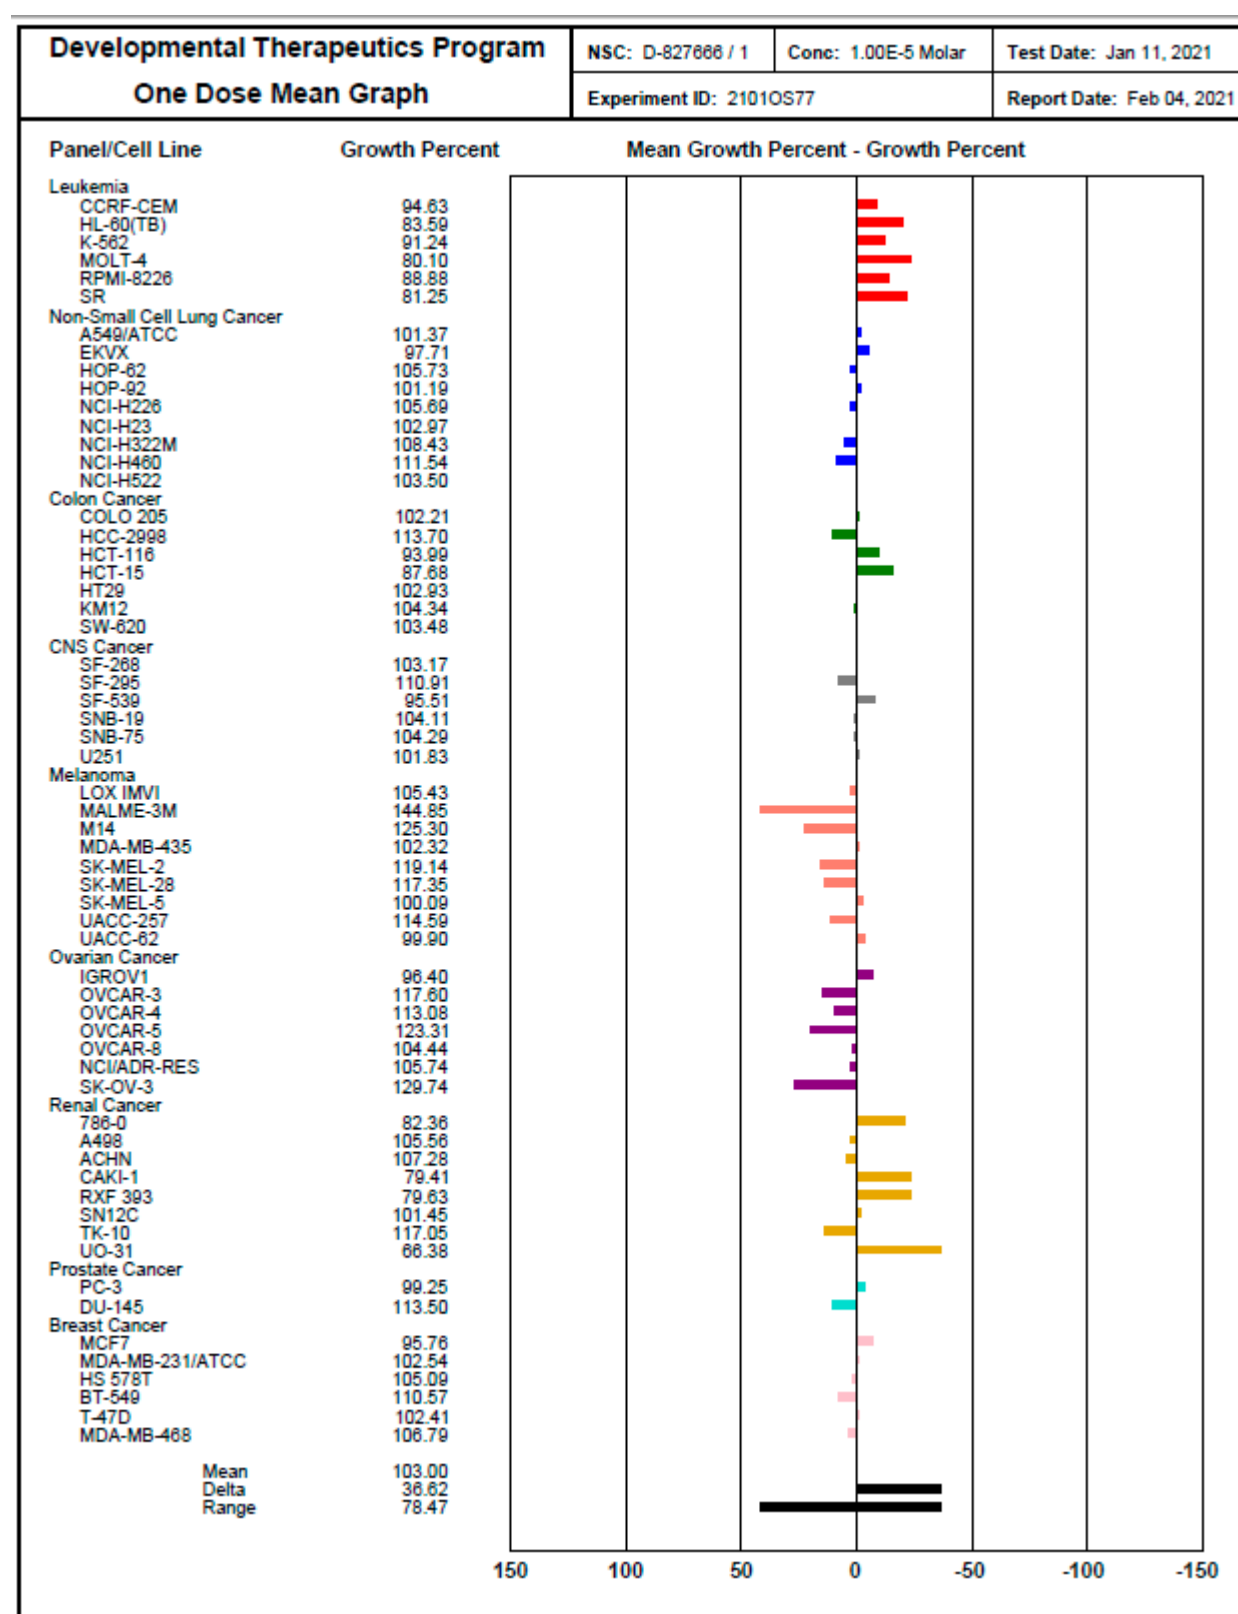

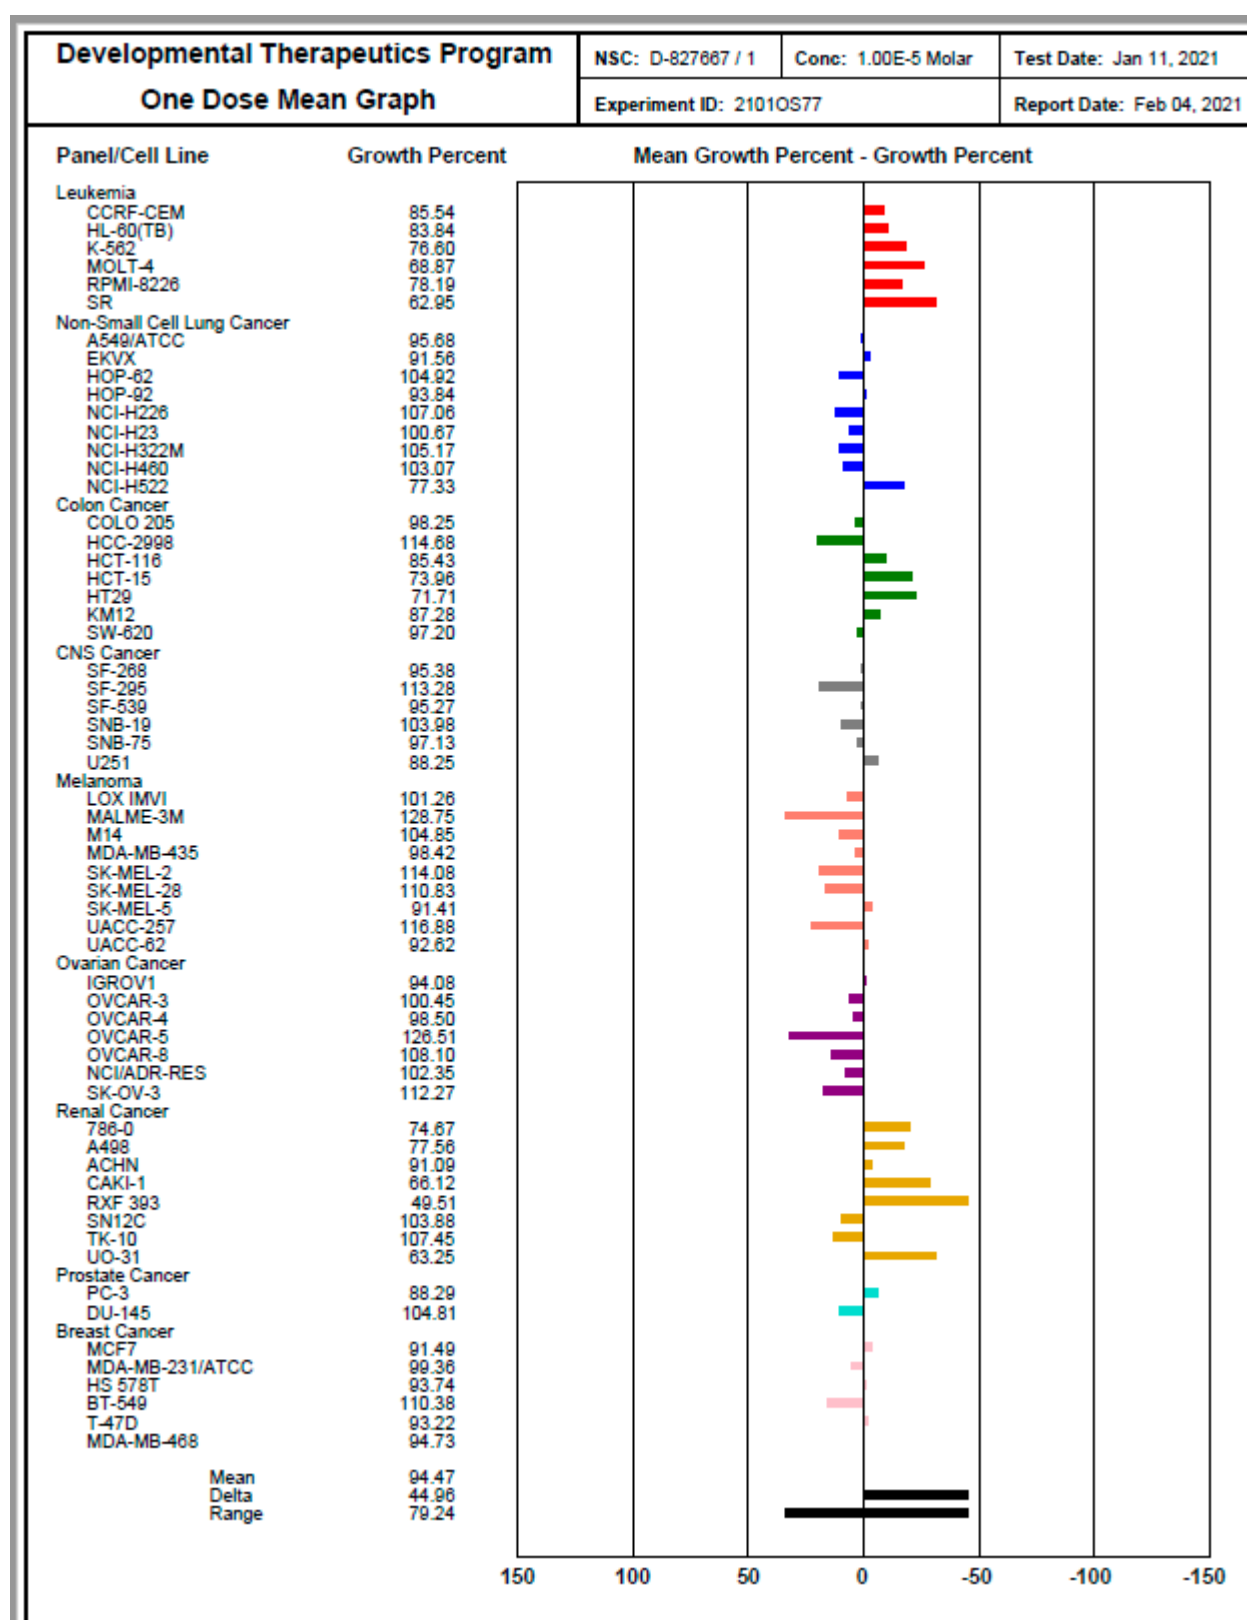

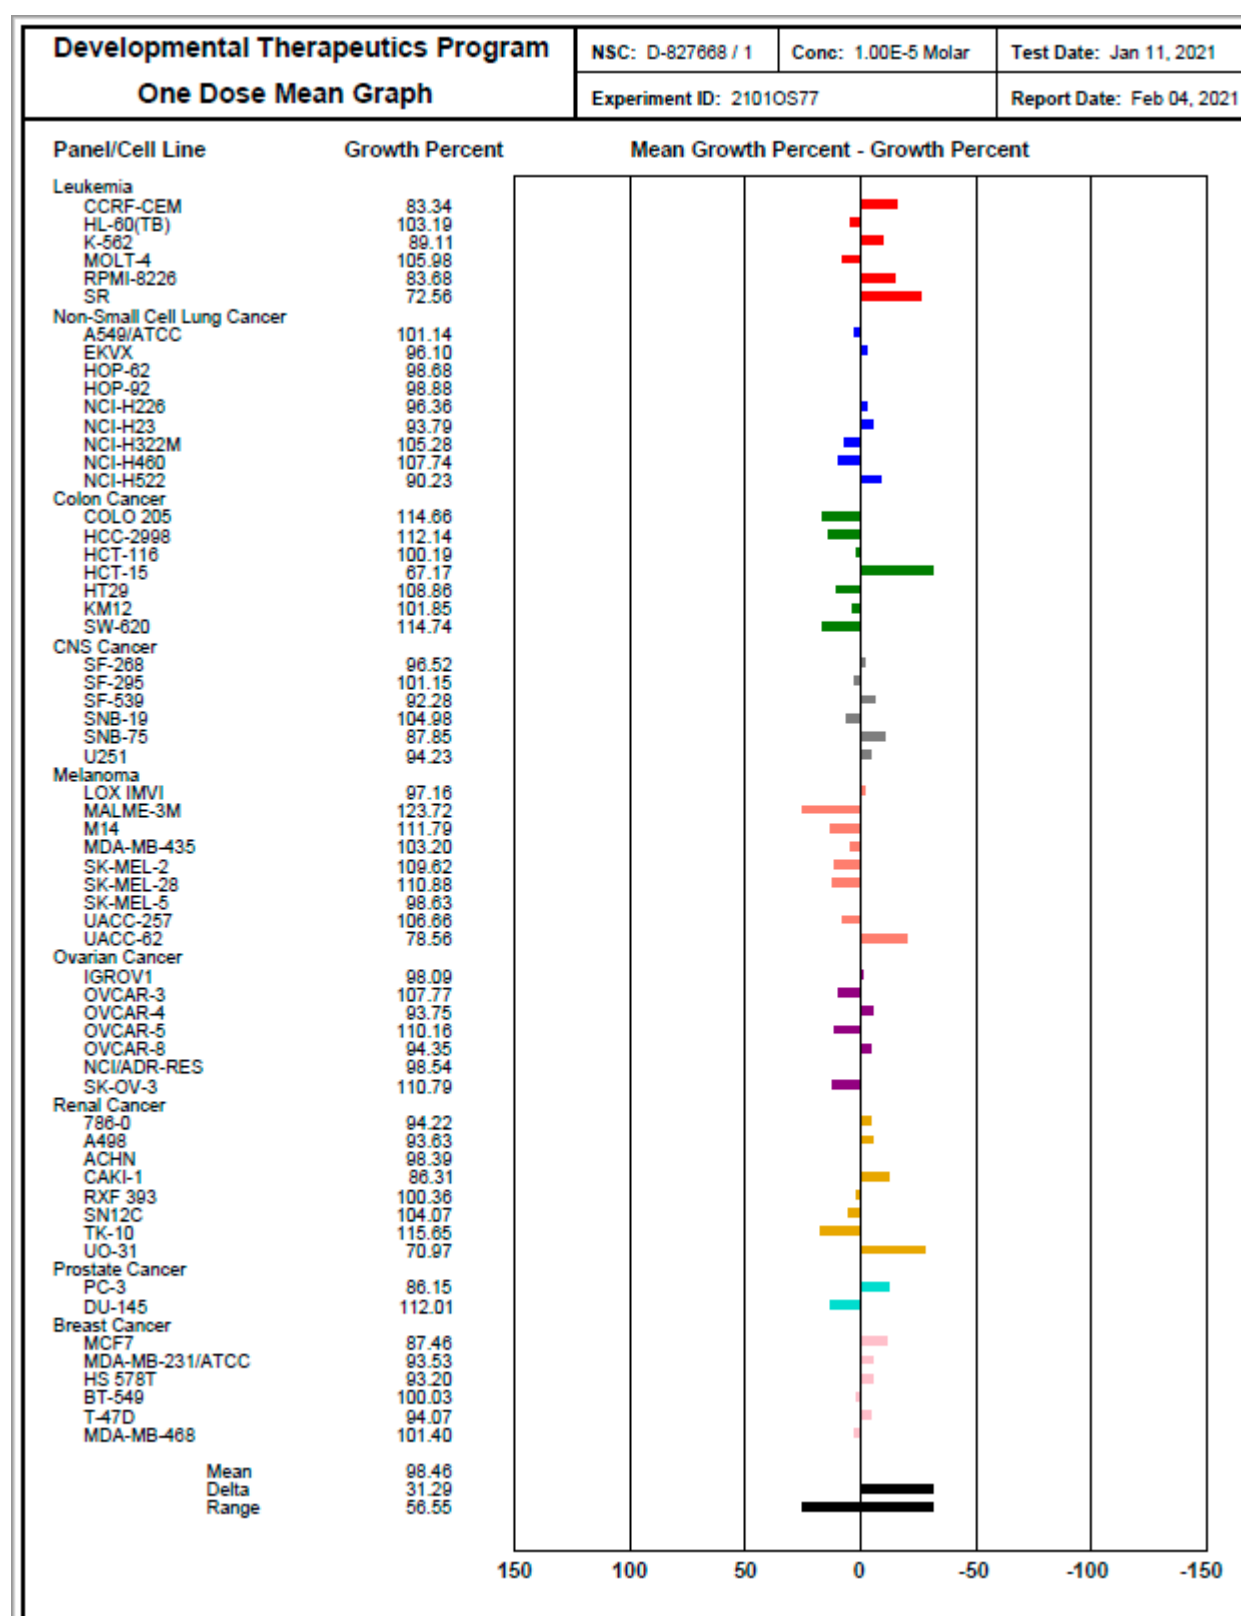

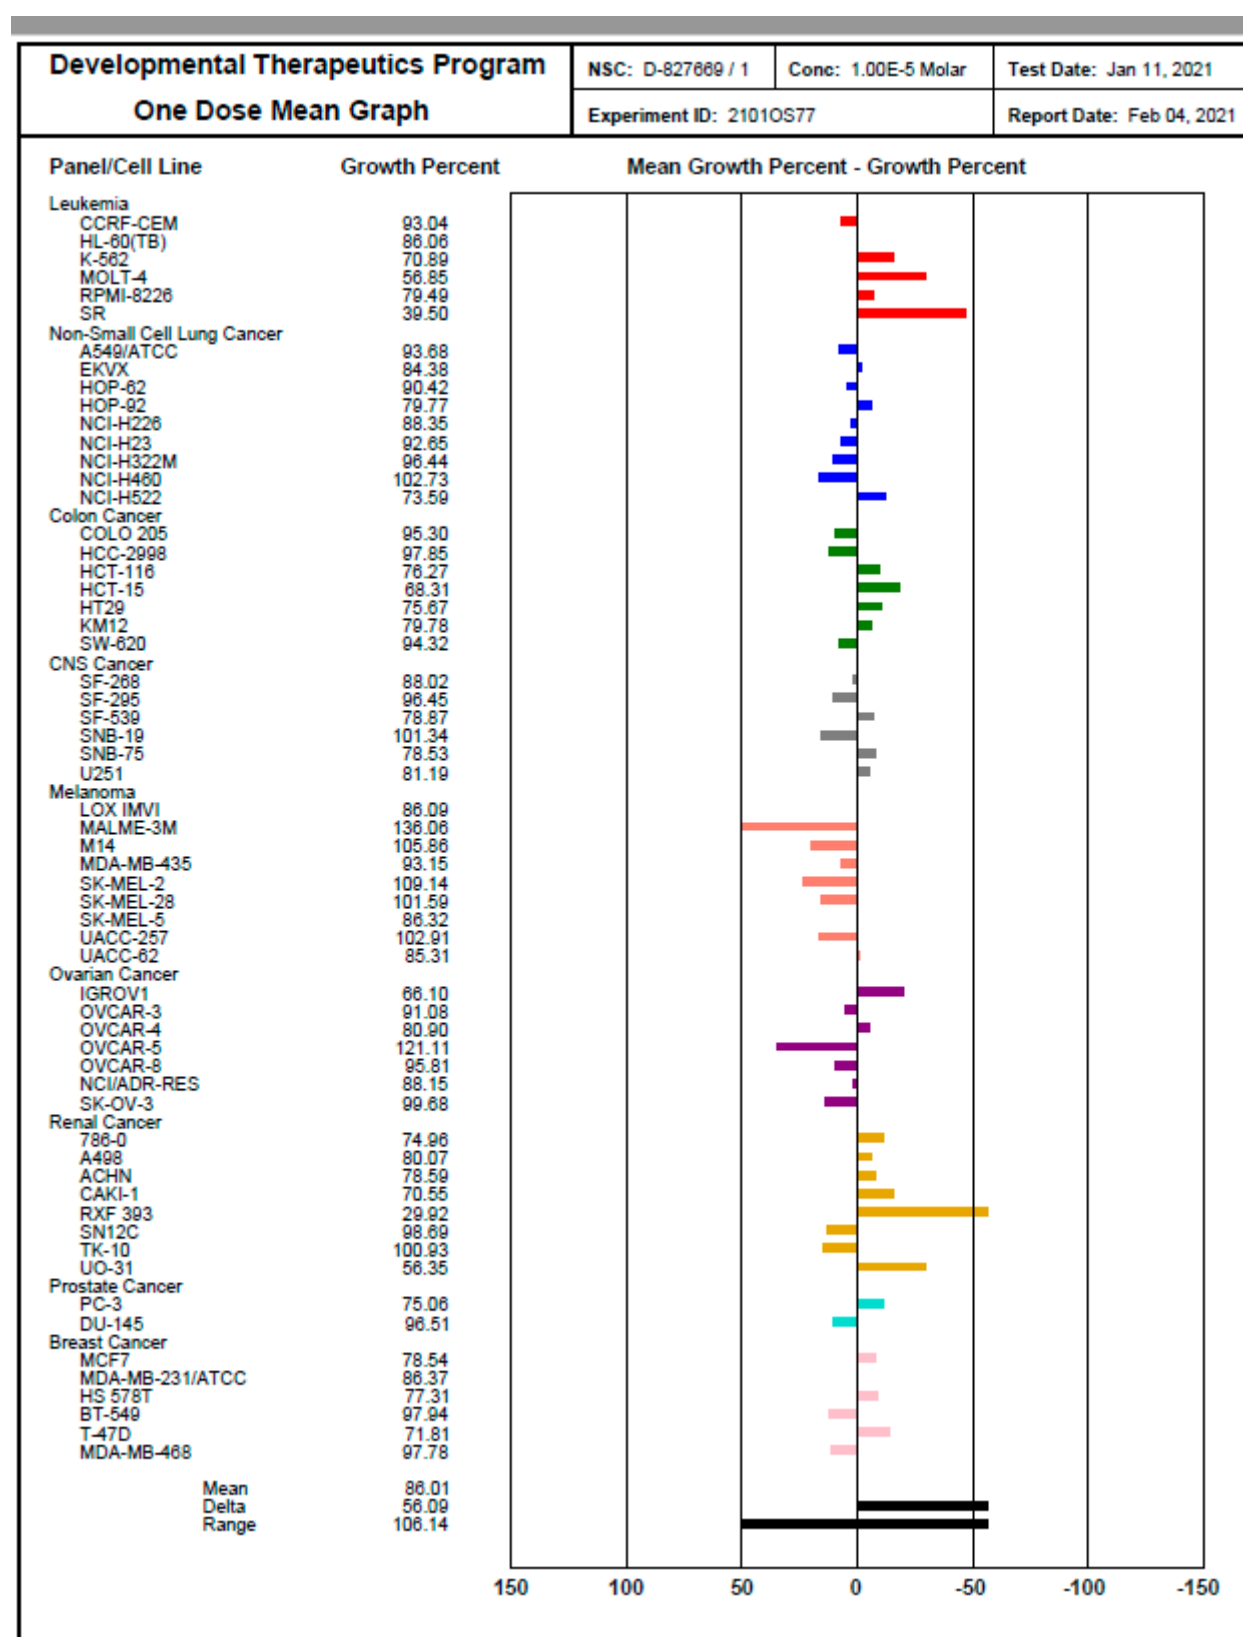

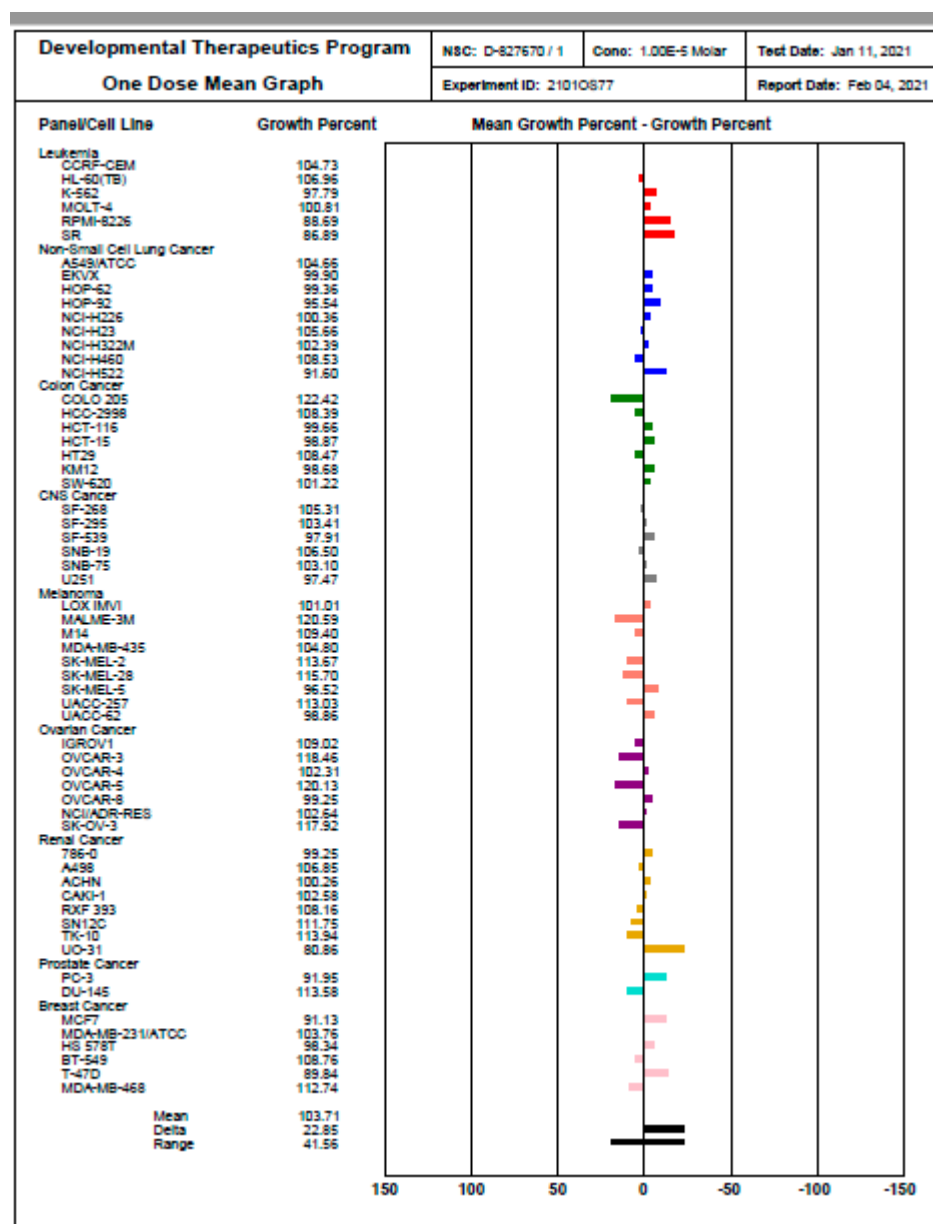

## 8. ADME (SwissADME)

Calculations were performed by the SwissADME web service <http://www.swissadme.ch> developed by the Molecular Modeling Group of the Swiss Institute of Bioinformatics that gives free access to a pool of fast yet robust predictive models for small molecules pharmacokinetic properties. (Sci. Rep. 2017, 7, 42717).
